# Supplementary material
Source: publisher figshare collection journal article supplement (https://frontiersin.figshare.com/ndownloader/files/14391707)
Supplement: Supplementary file [file 14391707]

## *Supplementary Material*

### **Fast, efficient and versatile synthesis of 6-amino-5-carboxamidouracils as precursors for 8-substituted xanthines**

**Daniel Marx<sup>‡</sup>, Lukas M. Wingen<sup>‡</sup>, Gregor Schnakenburg, Christa E. Müller\*, Matthias S. Scholz**

**\* Correspondence:** Christa E. Müller: [christa.mueller@uni-bonn.de](mailto:christa.mueller@uni-bonn.de)

<sup>‡</sup> These authors contributed equally to this work

#### **TABLE OF CONTENTS**

|                                                                     |    |
|---------------------------------------------------------------------|----|
| Synthesis of diaminouracil derivatives.....                         | 2  |
| Crystallographic data.....                                          | 3  |
| <sup>1</sup> H- and <sup>13</sup> C-NMR spectra of compound 21-39.. | 8  |
| IR spectra of compound <b>21-39</b> .....                           | 28 |
| References .....                                                    | 37 |

### Synthesis of diaminouracil derivatives

Different *N*1- and *N*3-substituted uracil derivatives required as precursors were synthesized according to literature procedures (Maxwell, et al., 1952; Müller et al., 1993; Hockemeyer et al., 2004). Due to the therapeutic potential of A<sub>2A</sub> and A<sub>2B</sub> adenosine receptor antagonists, we synthesized various 6-amino-5-carboxamidouracil precursors for xanthine derivatives containing ethyl and propargyl substituents at the uracil *N*1 atom, which are known to be beneficial for interaction with those adenosine receptor subtypes.

#### Scheme S1. Preparation of symmetrical *N*1,*N*3-dialkyl-5,6-diaminouracil derivatives.

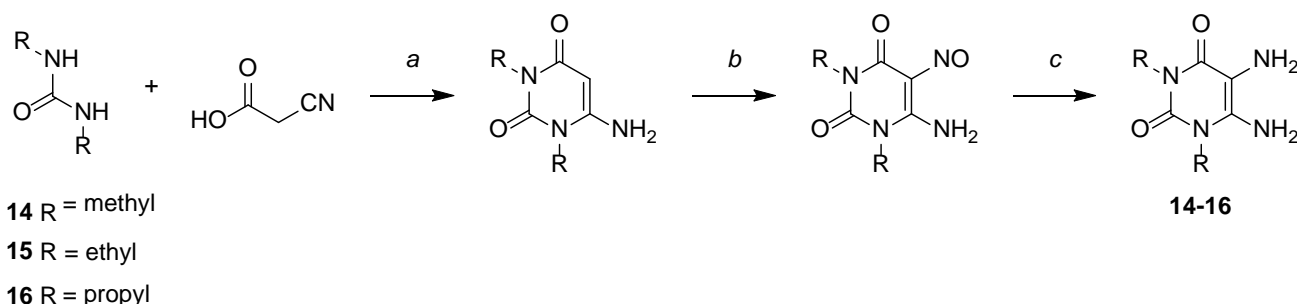

Reagents and conditions: (a) Ac<sub>2</sub>O, 60 °C, 3 h; (b) aq. AcOH, HNO<sub>2</sub>, 50-60 °C; (c) sodium dithionite, NH<sub>3</sub>/H<sub>2</sub>O, 60 °C.

#### Scheme S2. Preparation of *N*1- or *N*3-substituted 5,6-diaminouracil derivatives.

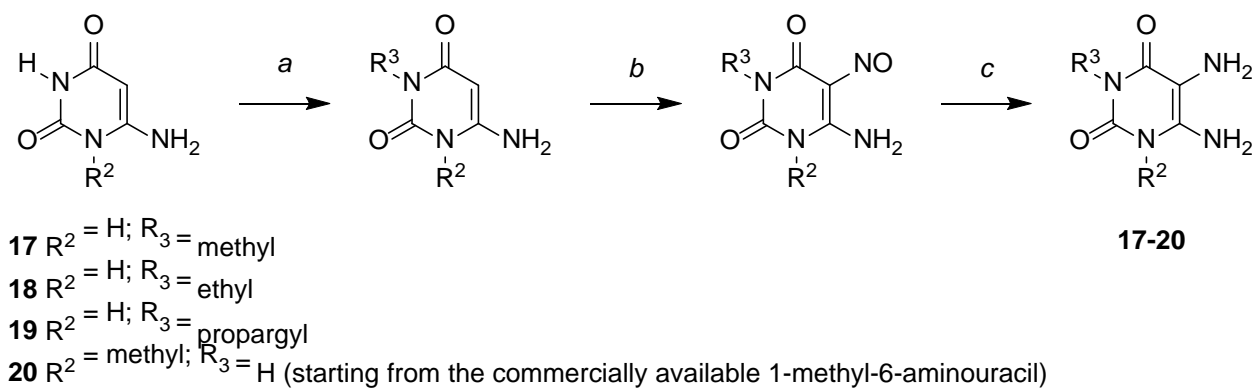

Reagents and conditions: (a) 2.1 equiv. of hexamethyldisilazane (HMDS), reflux, 60–70 °C, 1.7 equiv of methyl iodide for (17), ethyl iodide for (18) or 3-bromopropyne for (19); (b) aq. AcOH, HNO<sub>2</sub>, 50-60 °C; (c) sodium dithionite, NH<sub>3</sub>/H<sub>2</sub>O, 60 °C.

Analytical data were in accordance with published data. For details see (Maxwell, et al., 1952; Müller et al., 1993; Hockemeyer et al., 2004).

### Crystallographic data

CCDC 1878798 contains the supplementary crystallographic data for this paper. The data can be obtained free of charge from The Cambridge Crystallographic Data Centre via [www.ccdc.cam.ac.uk/structures](http://www.ccdc.cam.ac.uk/structures).

**Table S1. Crystal data and structure refinement for compound 32.**

|                                                                                   |                                                               |
|-----------------------------------------------------------------------------------|---------------------------------------------------------------|
| 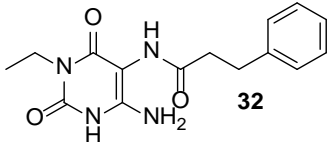 |                                                               |
| Identification code                                                               | GPHARM62, <b>32</b> // GXray5353f                             |
| Crystal Habitus                                                                   | clear colourless plate                                        |
| Device Type                                                                       | Bruker X8-KappaApexII                                         |
| Empirical formula                                                                 | C <sub>15</sub> H <sub>18</sub> N <sub>4</sub> O <sub>3</sub> |
| Moiety formula                                                                    | C <sub>15</sub> H <sub>18</sub> N <sub>4</sub> O <sub>3</sub> |
| Formula weight                                                                    | 302.33                                                        |
| Temperature/K                                                                     | 100                                                           |
| Crystal system                                                                    | monoclinic                                                    |
| Space group                                                                       | P2 <sub>1</sub>                                               |
| a/Å                                                                               | 4.6833(3)                                                     |
| b/Å                                                                               | 28.2023(18)                                                   |
| c/Å                                                                               | 5.4732(4)                                                     |
| α/°                                                                               | 90                                                            |
| β/°                                                                               | 98.690(3)                                                     |

|                                                |                                                                  |
|------------------------------------------------|------------------------------------------------------------------|
| $\gamma/^\circ$                                | 90                                                               |
| Volume/ $\text{\AA}^3$                         | 714.60(8)                                                        |
| Z                                              | 2                                                                |
| $\rho_{\text{calc}}/\text{g}/\text{cm}^3$      | 1.405                                                            |
| $\mu/\text{mm}^{-1}$                           | 0.101                                                            |
| F(000)                                         | 320.0                                                            |
| Crystal size/ $\text{mm}^3$                    | $0.4 \times 0.2 \times 0.08$                                     |
| Absorption correction                          | multi-scan                                                       |
| Tmin; Tmax                                     | 0.6046; 0.7460                                                   |
| Radiation                                      | MoK $\alpha$ ( $\lambda = 0.71073$ )                             |
| 2 $\Theta$ range for data collection/ $^\circ$ | 7.532 to 60.124 $^\circ$                                         |
| Completeness to theta                          | 0.995                                                            |
| Index ranges                                   | $-2 \leq h \leq 6$ , $-39 \leq k \leq 39$ , $-7 \leq l \leq 7$   |
| Reflections collected                          | 11797                                                            |
| Independent reflections                        | 4180 [ $R_{\text{int}} = 0.0380$ , $R_{\text{sigma}} = 0.0471$ ] |
| Data/restraints/parameters                     | 4180/1/201                                                       |
| Goodness-of-fit on $F^2$                       | 1.026                                                            |
| Final R indexes [ $I \geq 2\sigma(I)$ ]        | $R_1 = 0.0441$ , $wR_2 = 0.1014$                                 |
| Final R indexes [all data]                     | $R_1 = 0.0569$ , $wR_2 = 0.1097$                                 |
| Largest diff. peak/hole / $e \text{ \AA}^{-3}$ | 0.32/-0.23                                                       |
| Flack parameter                                | 0.2(5)                                                           |

---

**Table S2. Bond lengths for compound 32.**

| Atom | Atom | Length/Å | Atom | Atom | Length/Å |
|------|------|----------|------|------|----------|
| O7   | C2   | 1.214(3) | C5   | C6   | 1.375(3) |
| O10  | C4   | 1.244(3) | C8   | C9   | 1.523(4) |
| O13  | C12  | 1.237(3) | C12  | C14  | 1.511(3) |
| N1   | C2   | 1.381(3) | C14  | C15  | 1.522(3) |
| N1   | C6   | 1.369(3) | C15  | C16  | 1.515(3) |
| N3   | C2   | 1.383(3) | C16  | C17  | 1.381(4) |
| N3   | C4   | 1.396(3) | C16  | C21  | 1.386(4) |
| N3   | C8   | 1.485(3) | C17  | C18  | 1.391(4) |
| N11  | C5   | 1.420(3) | C18  | C19  | 1.355(5) |
| N11  | C12  | 1.351(3) | C19  | C20  | 1.384(5) |
| N22  | C6   | 1.351(3) | C20  | C21  | 1.387(4) |
| C4   | C5   | 1.425(3) |      |      |          |

**Table S3 Bond angles for compound 32.**

| Atom | Atom | Atom | Angle/°  | Atom | Atom | Atom | Angle/°  |
|------|------|------|----------|------|------|------|----------|
| C6   | N1   | C2   | 124.5(2) | N22  | C6   | C5   | 124.6(2) |
| C2   | N3   | C4   | 123.6(2) | N3   | C8   | C9   | 112.4(2) |
| C2   | N3   | C8   | 116.5(2) | O13  | C12  | N11  | 122.4(2) |
| C4   | N3   | C8   | 119.9(2) | O13  | C12  | C14  | 123.2(2) |
| C12  | N11  | C5   | 123.2(2) | N11  | C12  | C14  | 114.4(2) |
| O7   | C2   | N1   | 121.0(2) | C12  | C14  | C15  | 114.0(2) |
| O7   | C2   | N3   | 123.5(2) | C16  | C15  | C14  | 112.8(2) |
| N1   | C2   | N3   | 115.5(2) | C17  | C16  | C15  | 120.5(3) |
| O10  | C4   | N3   | 120.1(2) | C17  | C16  | C21  | 117.7(3) |
| O10  | C4   | C5   | 123.0(2) | C21  | C16  | C15  | 121.7(2) |
| N3   | C4   | C5   | 116.9(2) | C16  | C17  | C18  | 121.2(3) |
| N11  | C5   | C4   | 119.5(2) | C19  | C18  | C17  | 120.8(3) |
| C6   | C5   | N11  | 119.8(2) | C18  | C19  | C20  | 118.9(3) |
| C6   | C5   | C4   | 120.6(2) | C19  | C20  | C21  | 120.7(3) |
| N1   | C6   | C5   | 118.5(2) | C16  | C21  | C20  | 120.6(3) |
| N22  | C6   | N1   | 116.8(2) |      |      |      |          |

**Table S4. Hydrogen bonds for compound 32.**

| <b>D</b>                                                                   | <b>H</b> | <b>A</b>         | <b>d(D-H)/Å</b> | <b>d(H-A)/Å</b> | <b>d(D-A)/Å</b> | <b>D-H-A/°</b> |
|----------------------------------------------------------------------------|----------|------------------|-----------------|-----------------|-----------------|----------------|
| N1                                                                         | H1       | O10 <sup>1</sup> | 0.88            | 1.90            | 2.717(3)        | 153.7          |
| N11                                                                        | H11      | O13 <sup>2</sup> | 0.88            | 2.39            | 2.975(3)        | 123.7          |
| N22                                                                        | H22A     | O10 <sup>1</sup> | 0.86            | 2.18            | 2.875(3)        | 137.5          |
| N22                                                                        | H22B     | O13 <sup>2</sup> | 0.86            | 2.14            | 2.994(3)        | 170.5          |
| C9                                                                         | H9B      | O7 <sup>3</sup>  | 0.98            | 2.31            | 3.276(3)        | 168.6          |
| <sup>1</sup> -1+X,+Y,-1+Z; <sup>2</sup> -1+X,+Y,+Z; <sup>3</sup> +X,+Y,1+Z |          |                  |                 |                 |                 |                |

**$^1\text{H}$ - and  $^{13}\text{C}$ -NMR spectra of compounds 21-**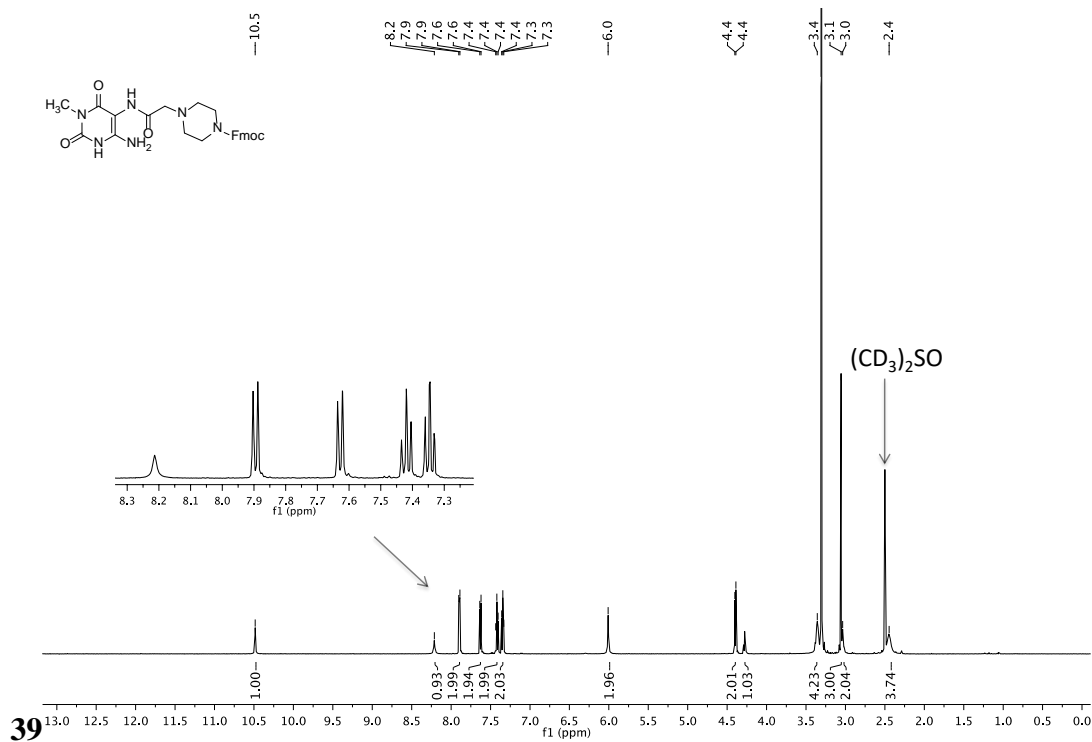



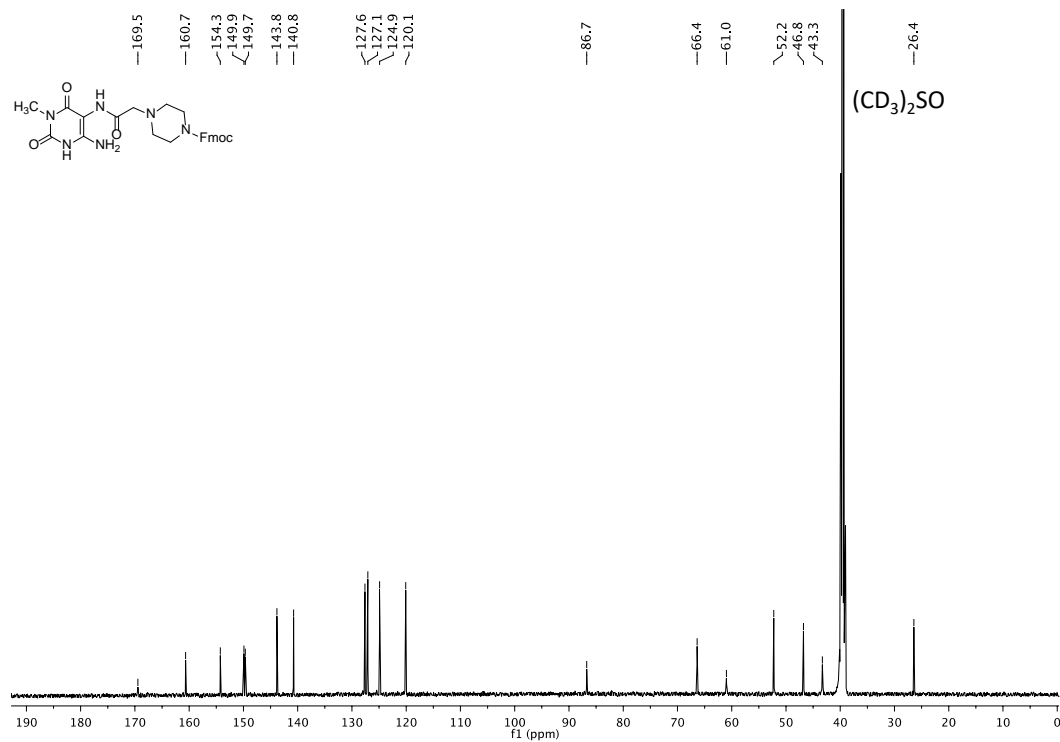

**Figure S2.** <sup>13</sup>C-NMR spectrum of 21 in (CD<sub>3</sub>)<sub>2</sub>SO at room temperature

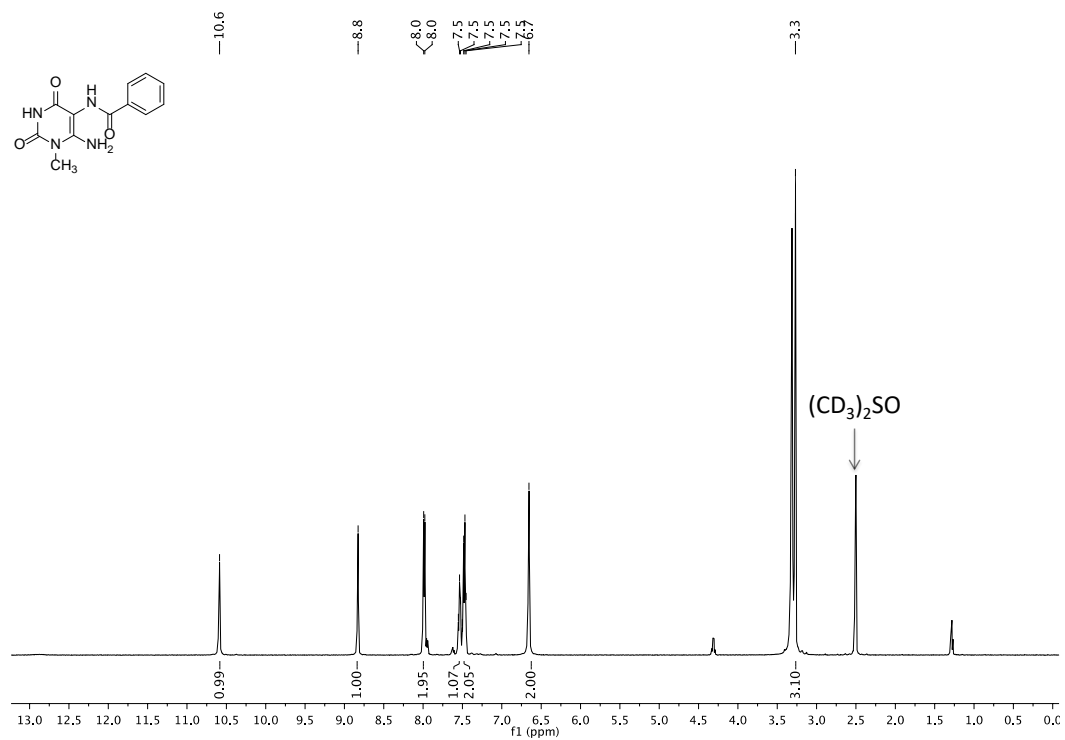

**Figure S3.** <sup>1</sup>H-NMR spectrum of 22 in (CD<sub>3</sub>)<sub>2</sub>SO at room temperature.

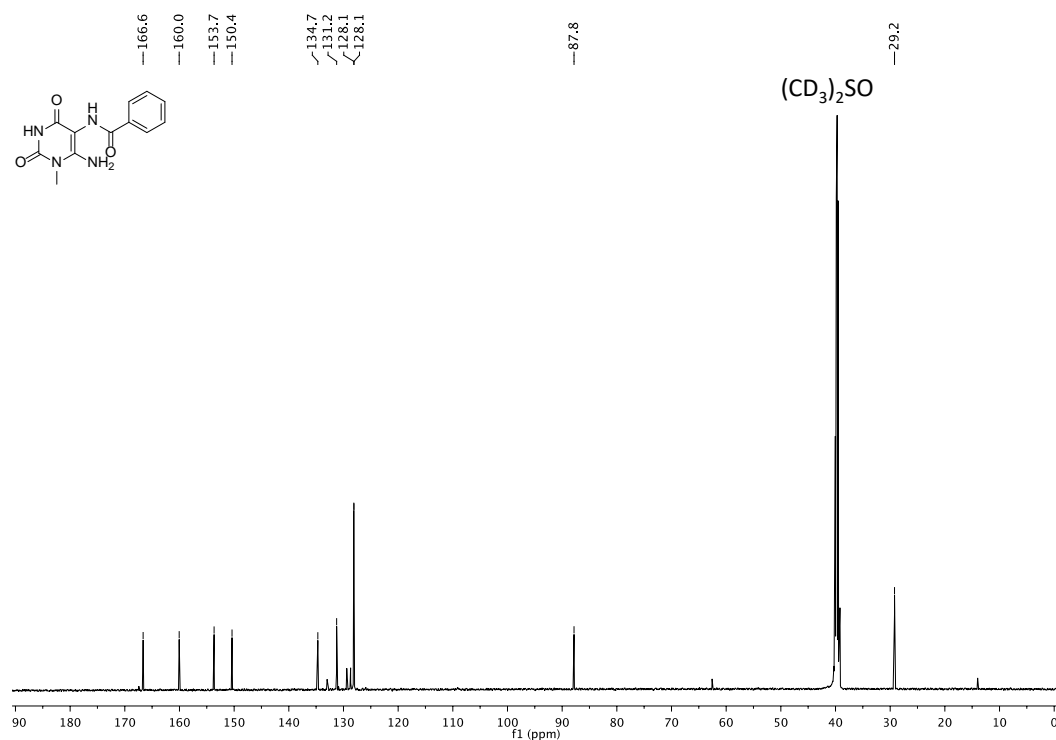

**Figure S4.**  $^{13}\text{C}$ -NMR spectrum of 22 in (CD<sub>3</sub>)<sub>2</sub>SO at room temperature.

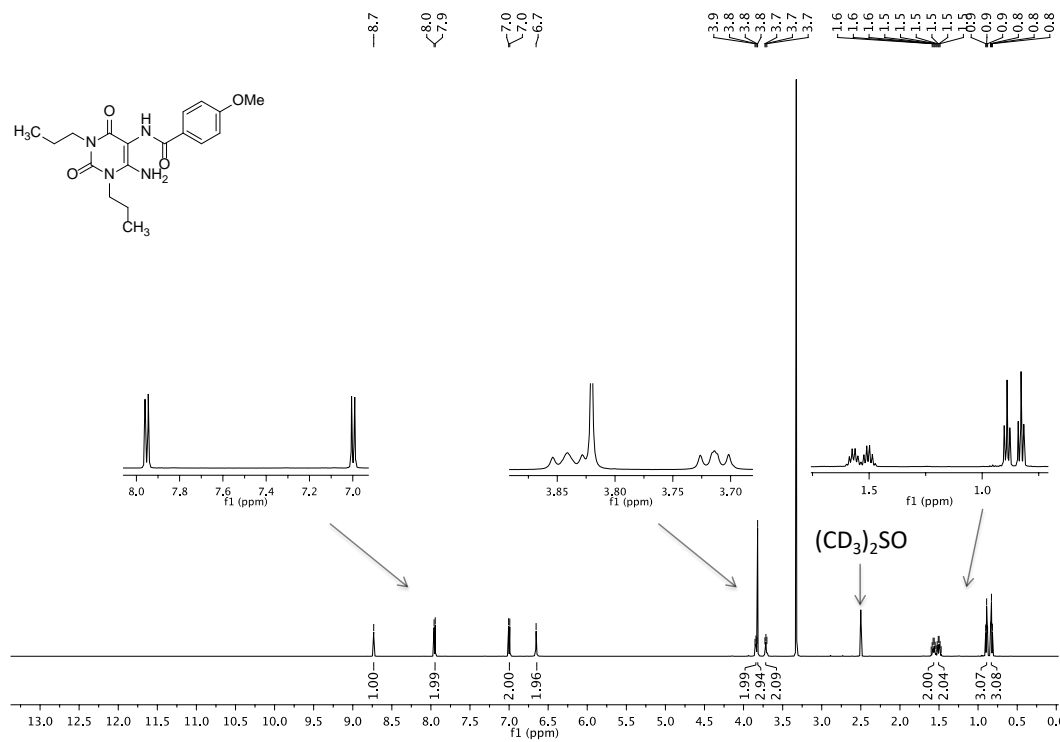

**Figure S5.**  $^1\text{H}$ -NMR spectrum of 23 in (CD<sub>3</sub>)<sub>2</sub>SO at room temperature.

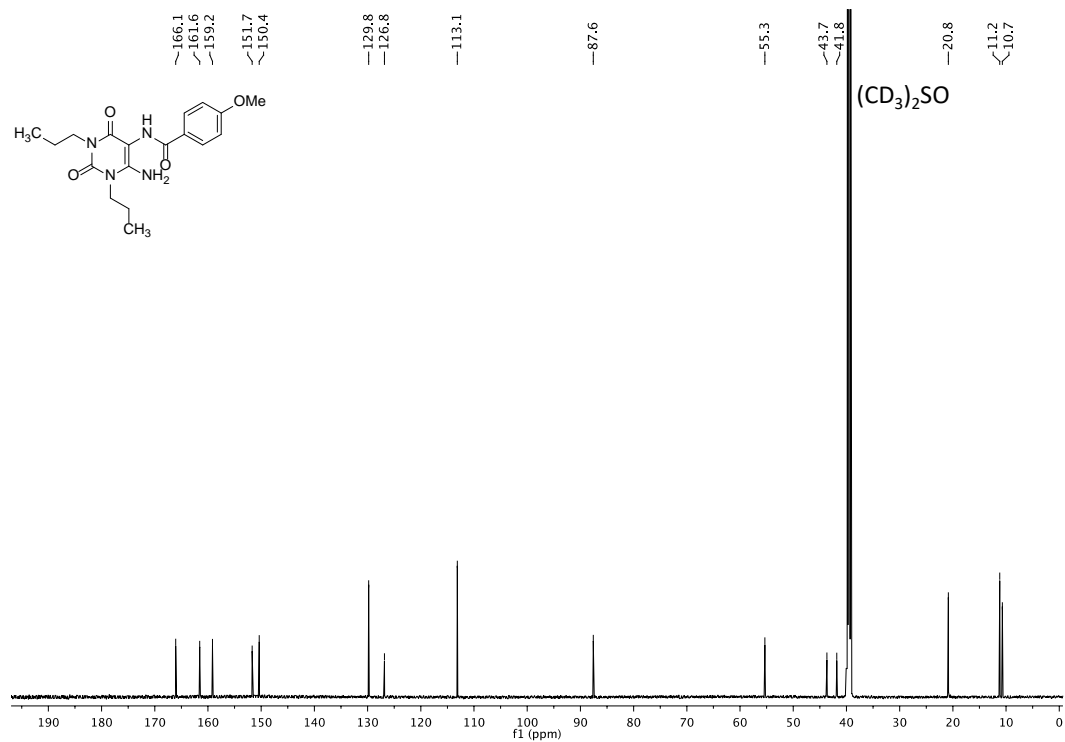

**Figure S6.** <sup>13</sup>C-NMR spectrum of 23 in (CD<sub>3</sub>)<sub>2</sub>SO at room temperature.

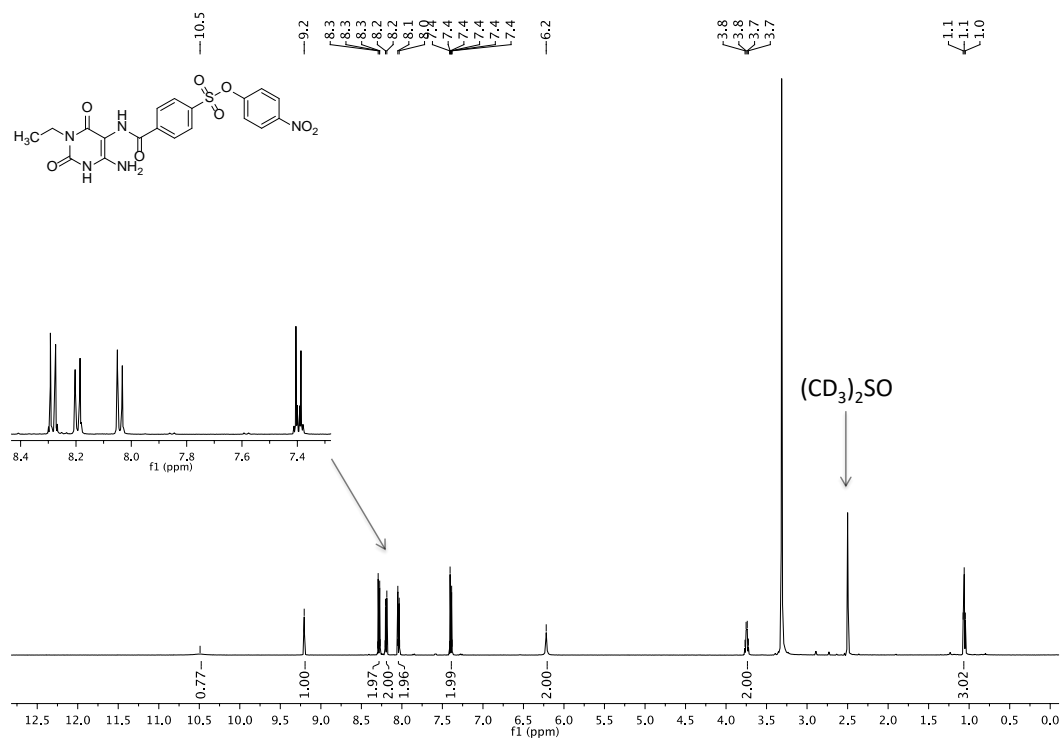

**Figure S7.** <sup>1</sup>H-NMR spectrum of 24 in (CD<sub>3</sub>)<sub>2</sub>SO at room temperature.

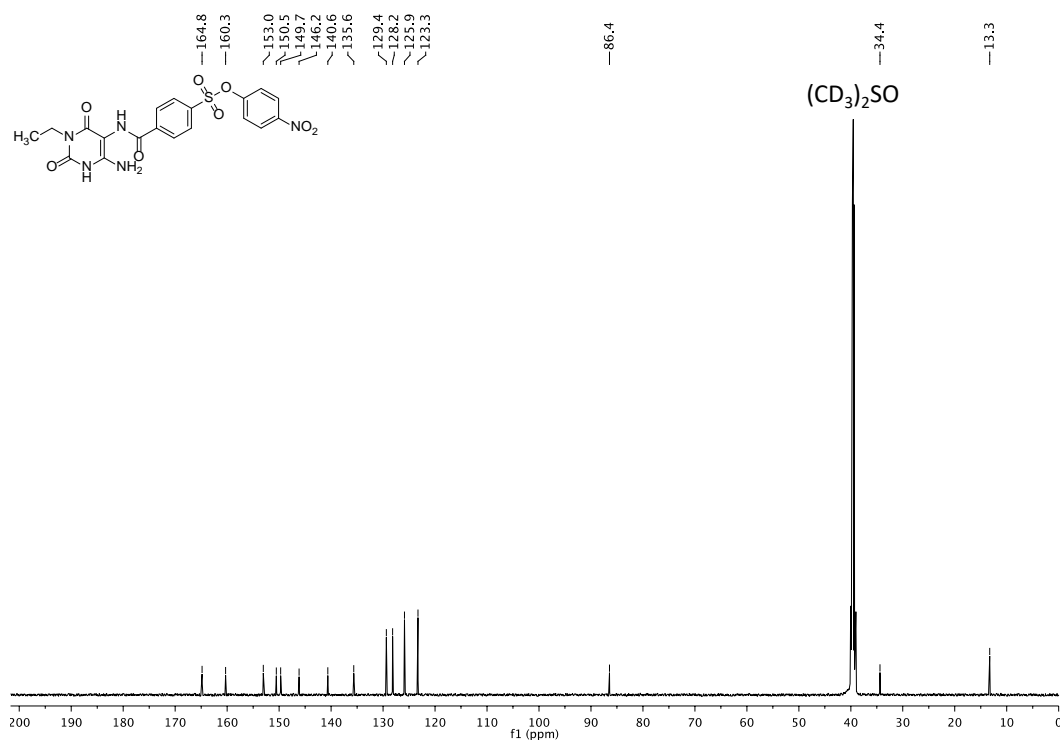

**Figure S8.** <sup>13</sup>C-NMR spectrum of 24 in (CD<sub>3</sub>)<sub>2</sub>SO at room temperature.

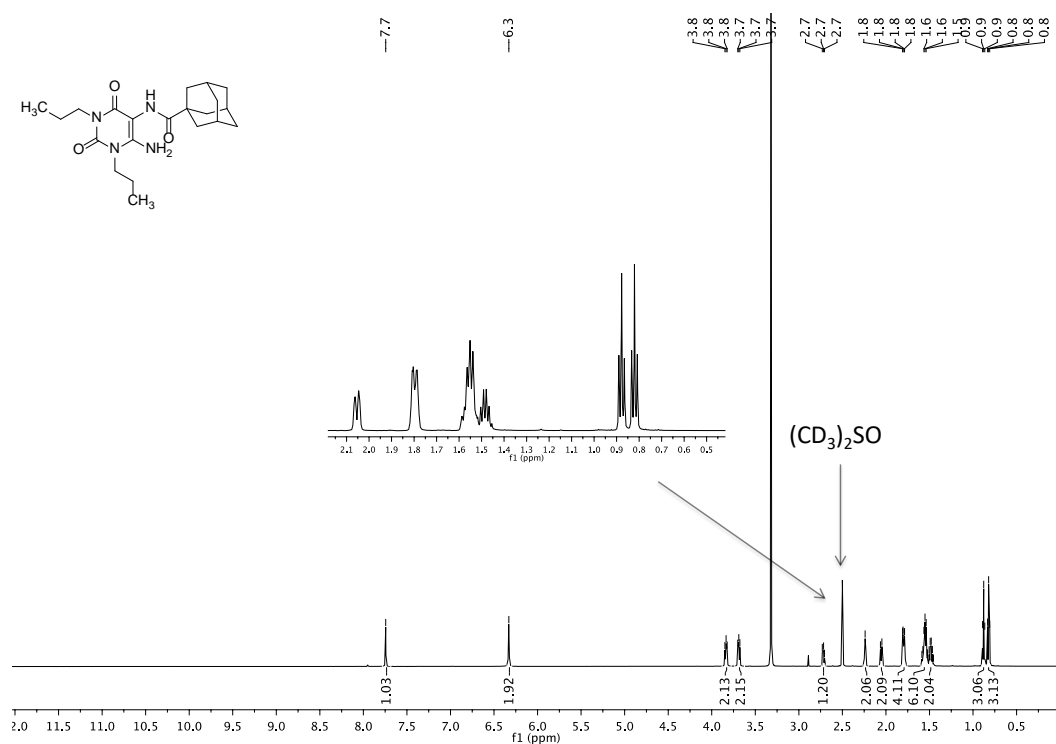

**Figure S9.** <sup>1</sup>H-NMR spectrum of 25 in (CD<sub>3</sub>)<sub>2</sub>SO at room temperature.

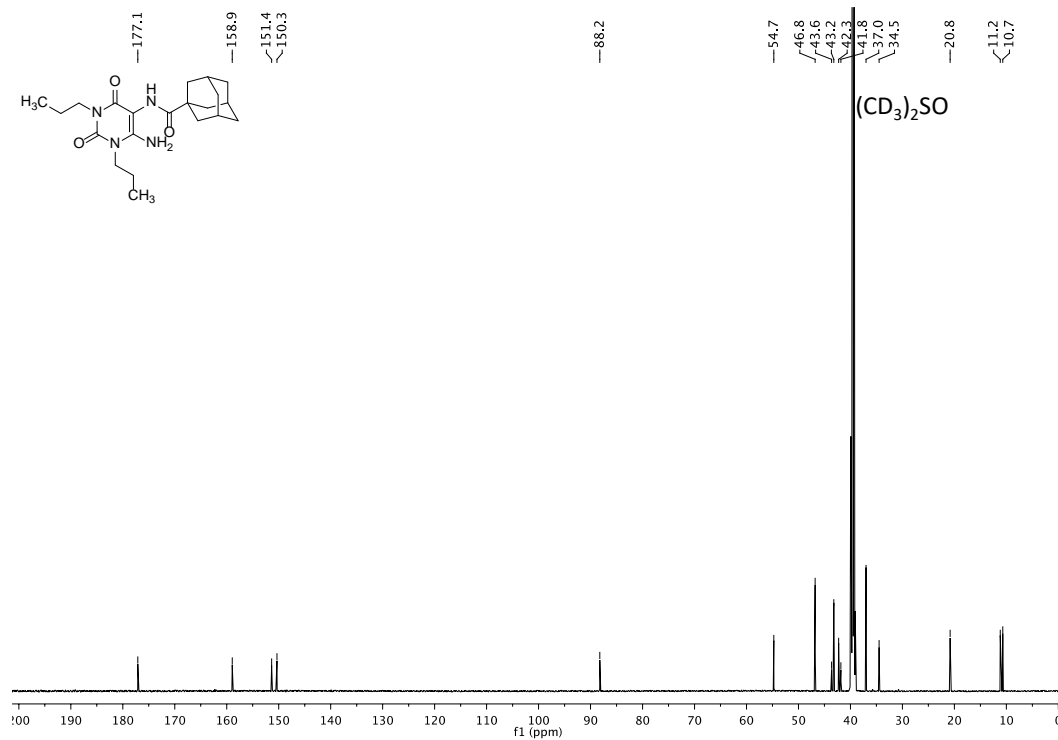

Figure S10. <sup>13</sup>C-NMR spectrum of 25 in (CD<sub>3</sub>)<sub>2</sub>SO at room temperature.

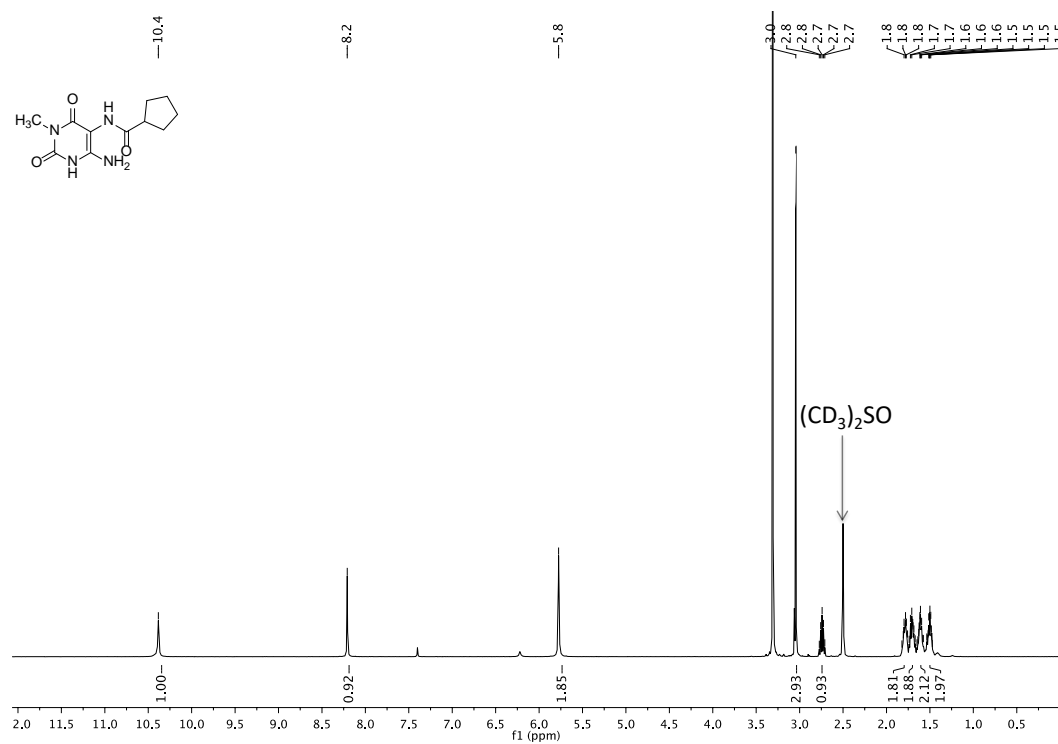

Figure S11. <sup>1</sup>H-NMR spectrum of 26 in (CD<sub>3</sub>)<sub>2</sub>SO at room temperature.

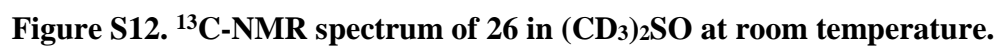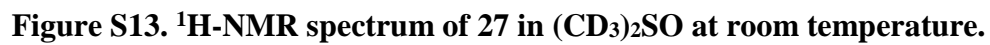

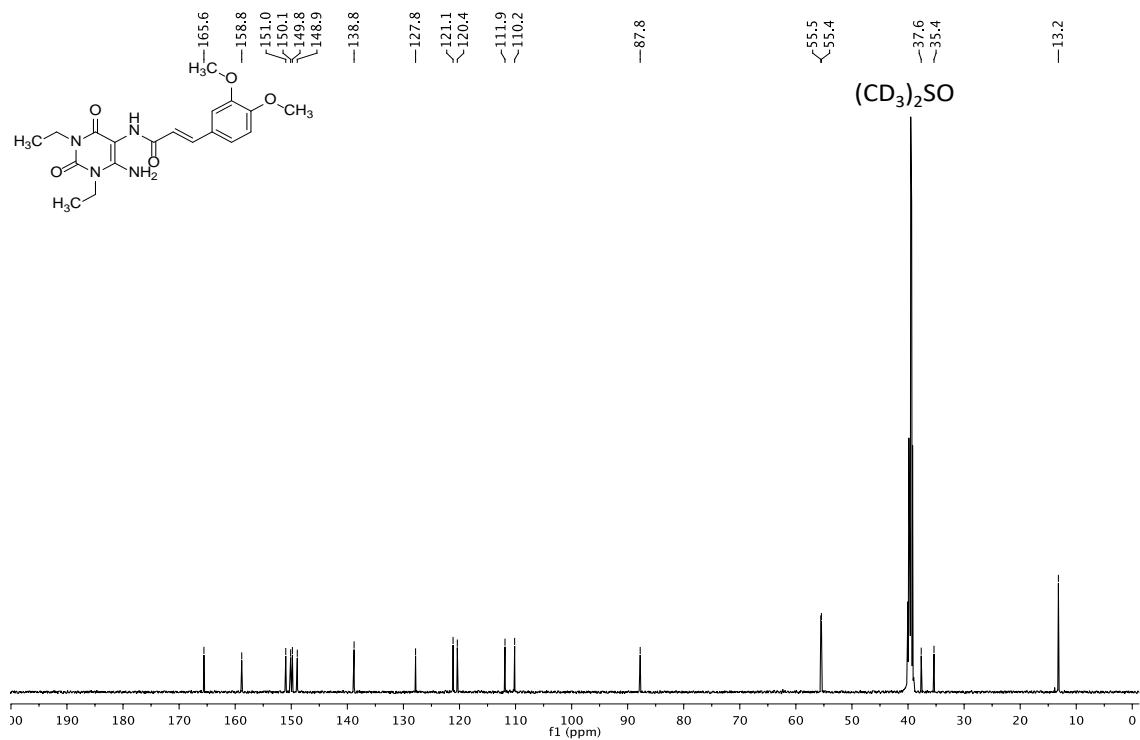

Figure S14. <sup>13</sup>C-NMR spectrum of 27 in (CD<sub>3</sub>)<sub>2</sub>SO at room temperature.

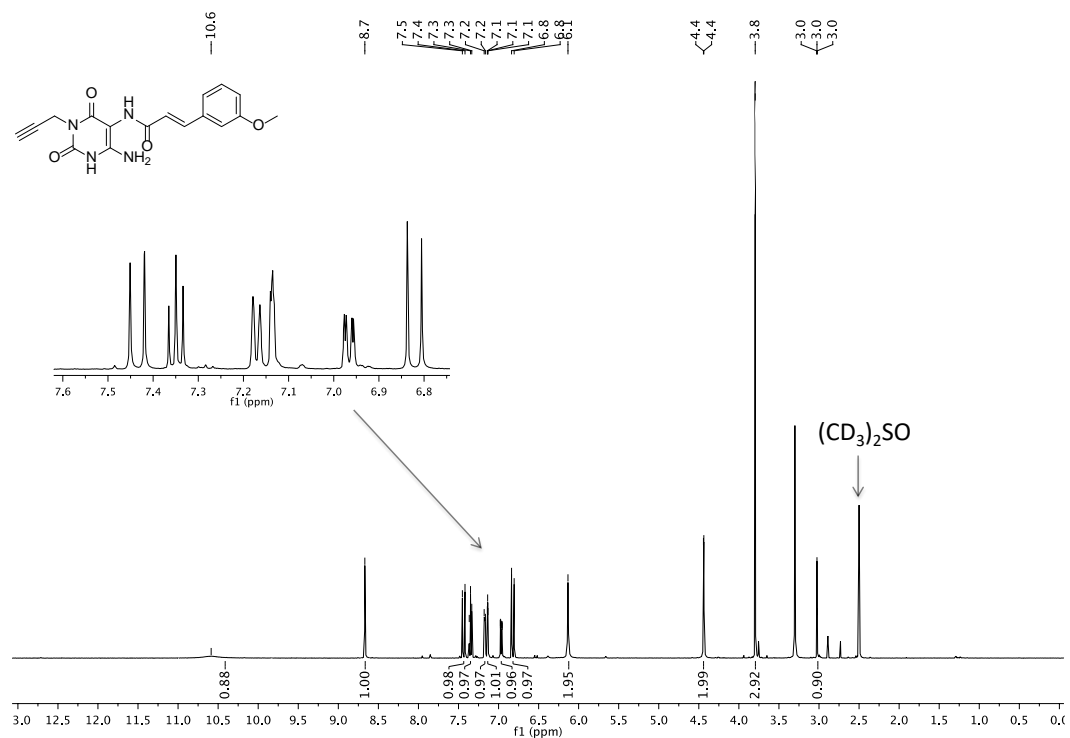

Figure S15. <sup>1</sup>H-NMR spectrum of 28 in (CD<sub>3</sub>)<sub>2</sub>SO at room temperature.

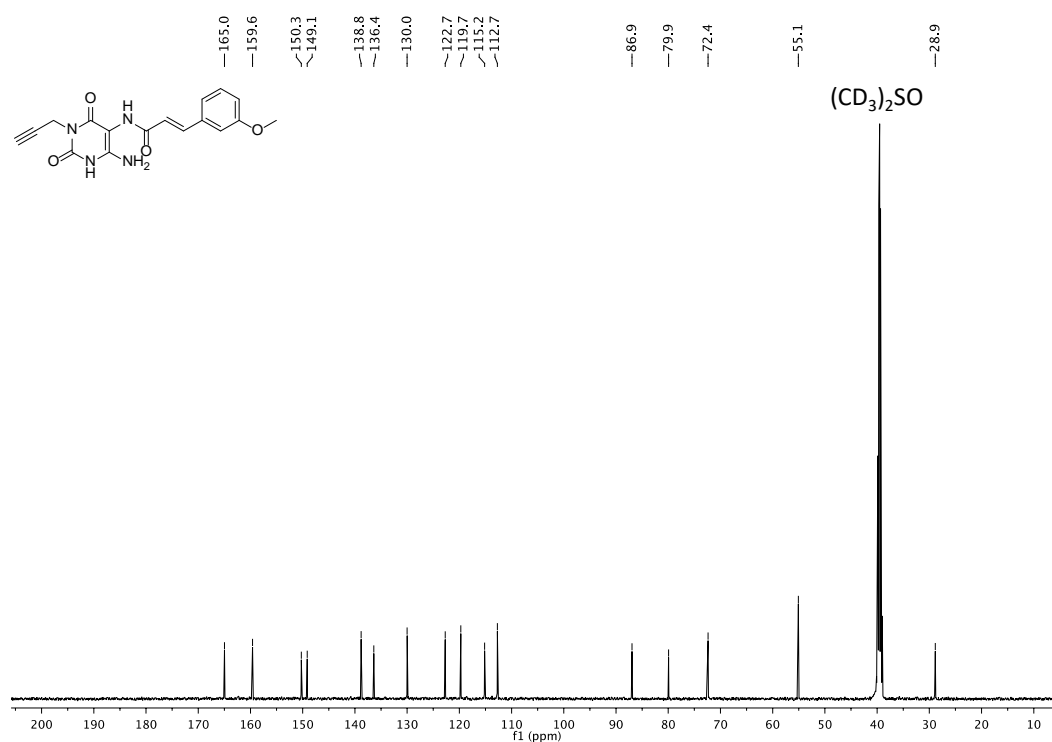

Figure S16. <sup>13</sup>C-NMR spectrum of 28 in (CD<sub>3</sub>)<sub>2</sub>SO at room temperature.

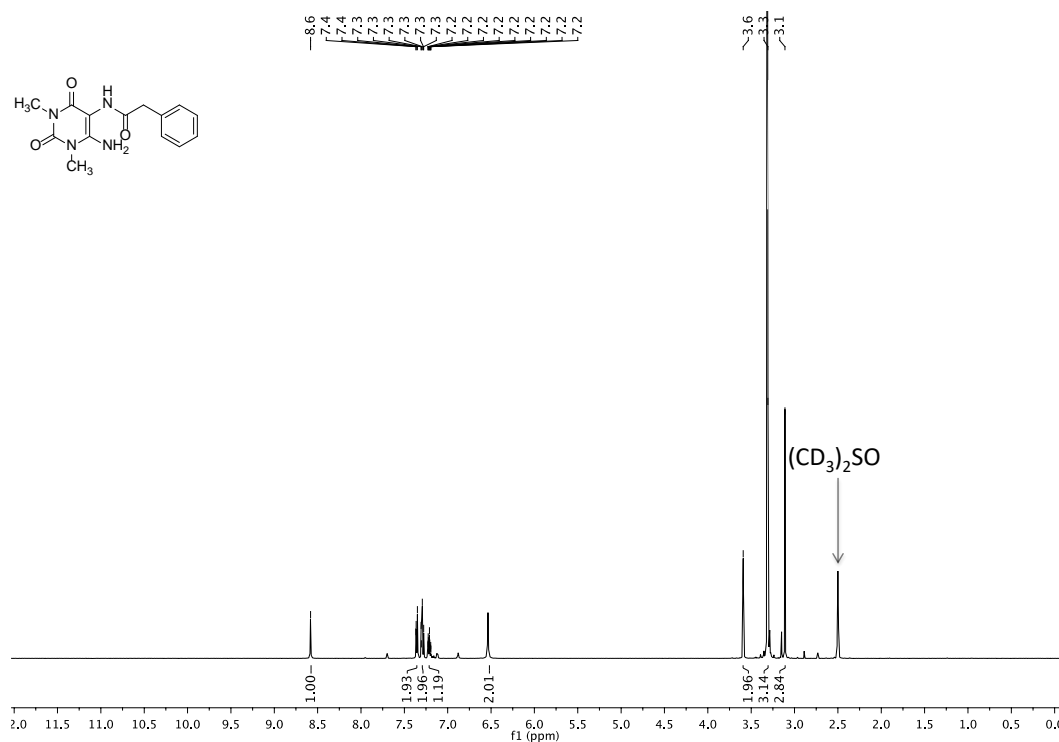

Figure S17. <sup>1</sup>H-NMR spectrum of 29 in (CD<sub>3</sub>)<sub>2</sub>SO at room temperature.



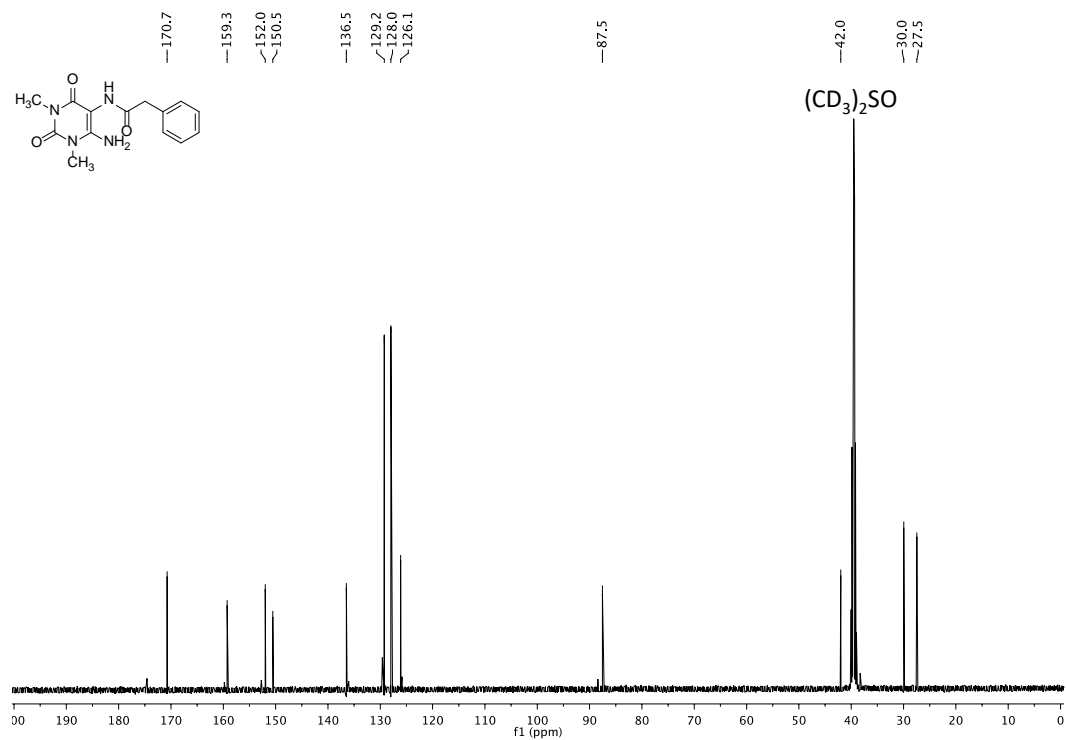

Figure S18. <sup>13</sup>C-NMR spectrum of 29 in (CD<sub>3</sub>)<sub>2</sub>SO at room temperature.

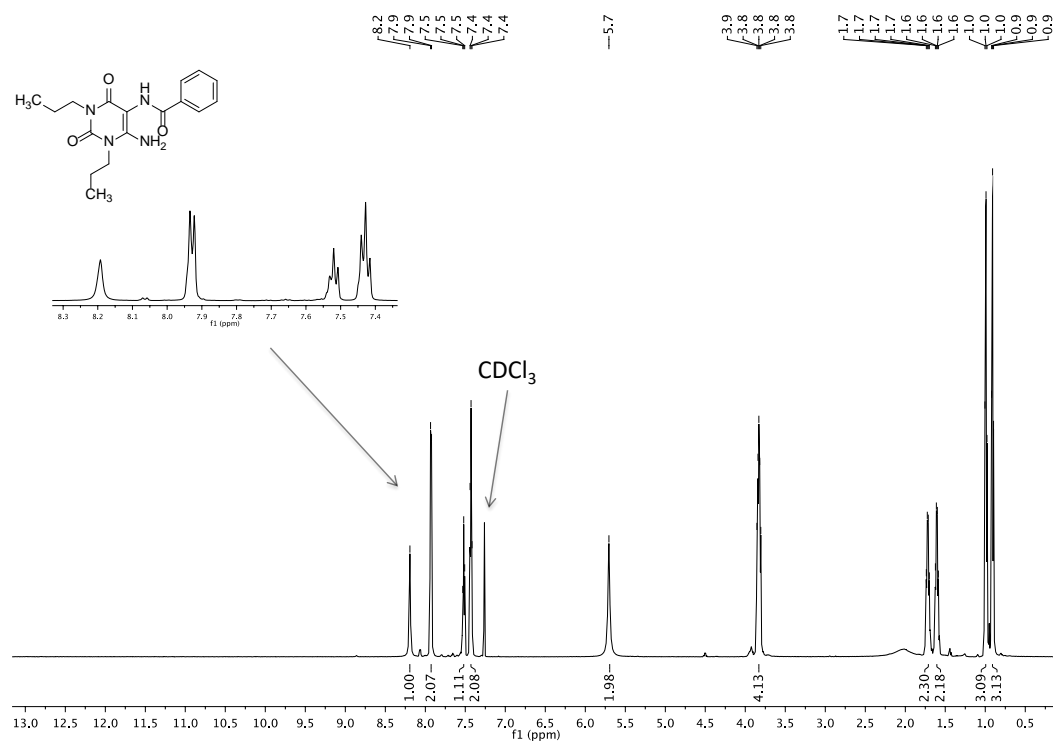

Figure S19. <sup>1</sup>H-NMR spectrum of 30 in (CD<sub>3</sub>)<sub>2</sub>SO at room temperature.

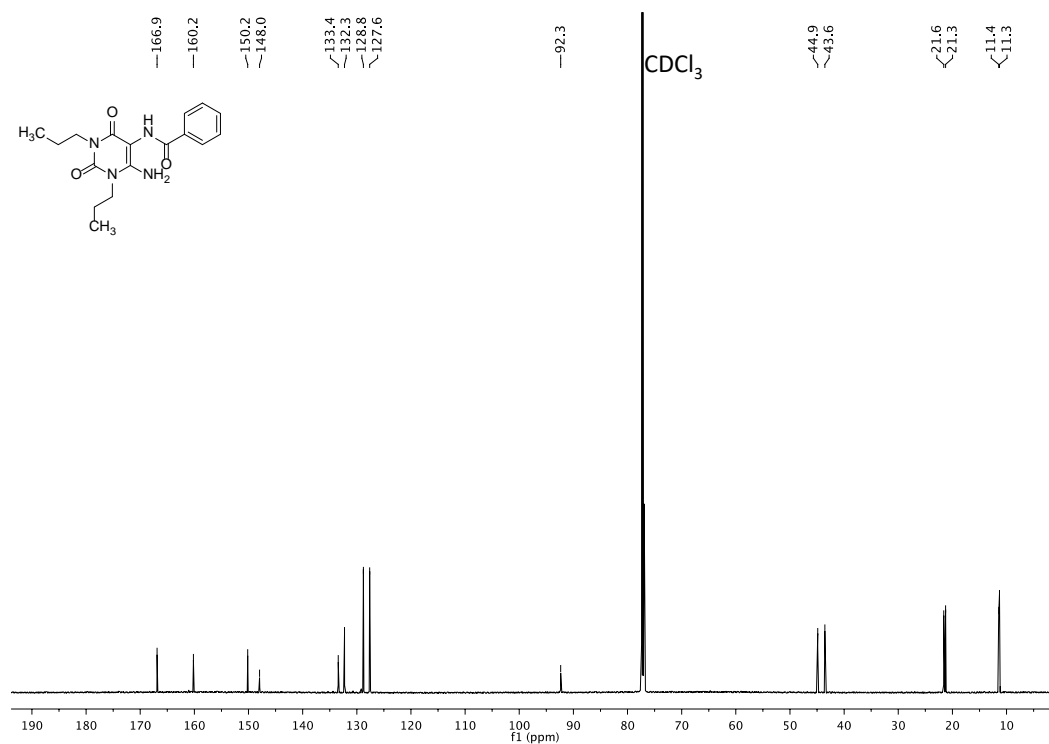

**Figure S20.**  $^{13}\text{C}$ -NMR spectrum of 30 in  $(\text{CD}_3)_2\text{SO}$  at room temperature.

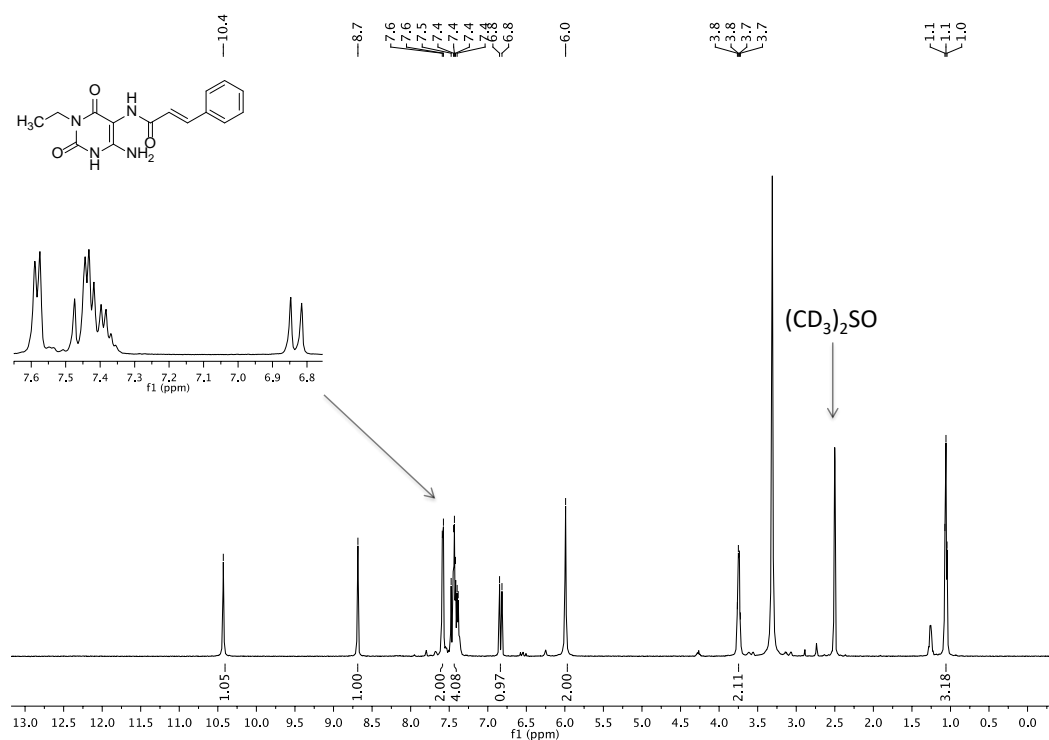

**Figure S21.**  $^1\text{H}$ -NMR spectrum of 31 in  $(\text{CD}_3)_2\text{SO}$  at room temperature.

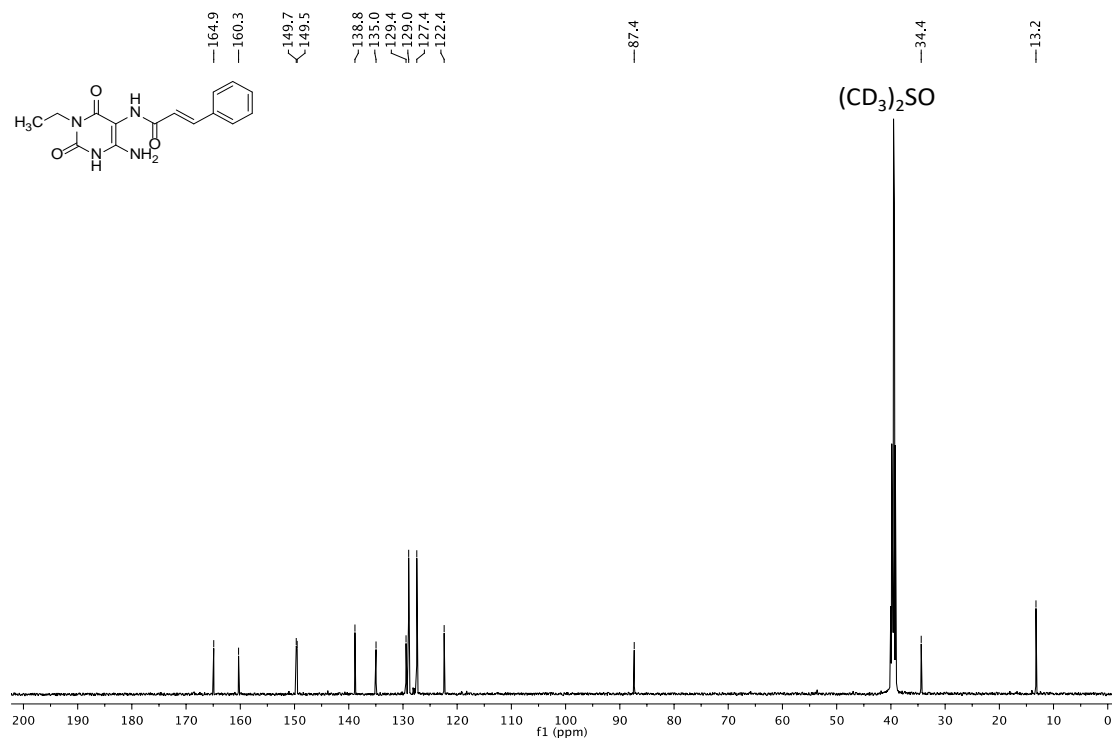

**Figure S22.**  $^{13}\text{C}$ -NMR spectrum of 31 in  $(\text{CD}_3)_2\text{SO}$  at room temperature.

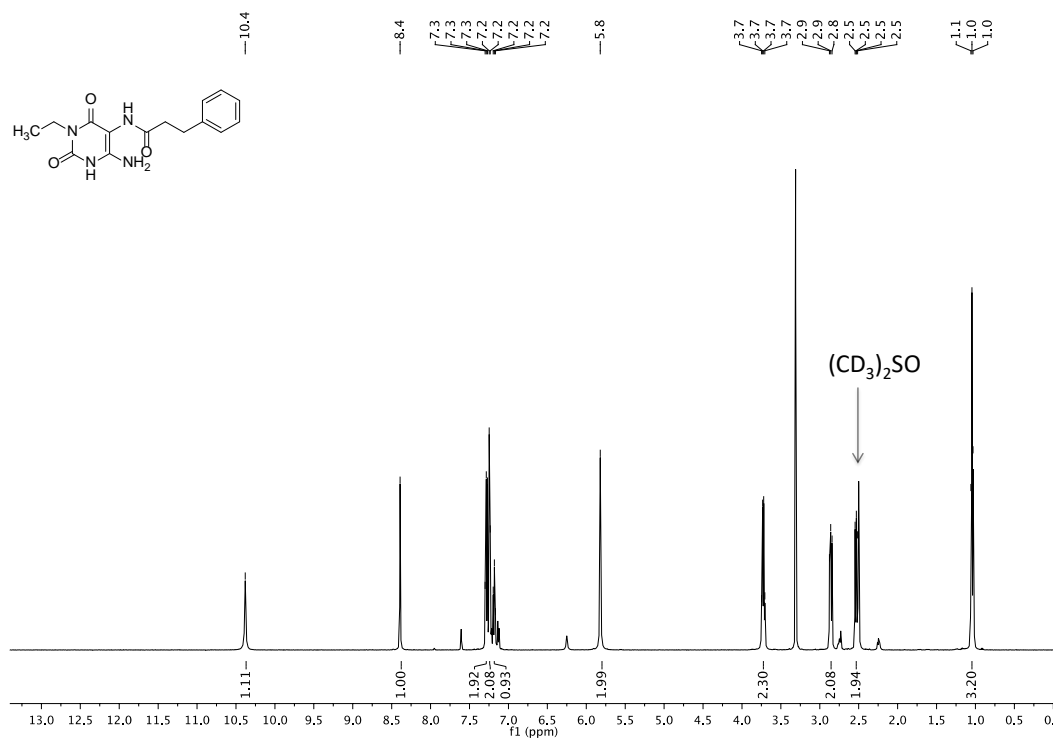

**Figure S23.**  $^1\text{H}$ -NMR spectrum of 32 in  $(\text{CD}_3)_2\text{SO}$  at room temperature.

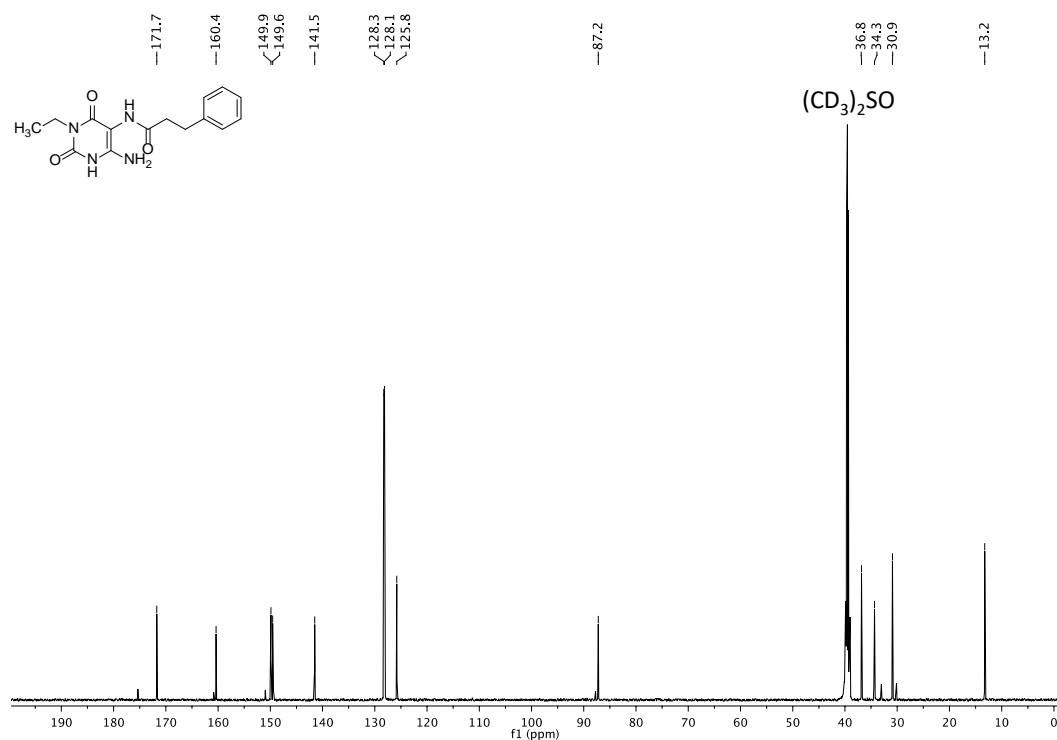

**Figure S24.**  $^{13}\text{C}$ -NMR spectrum of 32 in  $(\text{CD}_3)_2\text{SO}$  at room temperature.

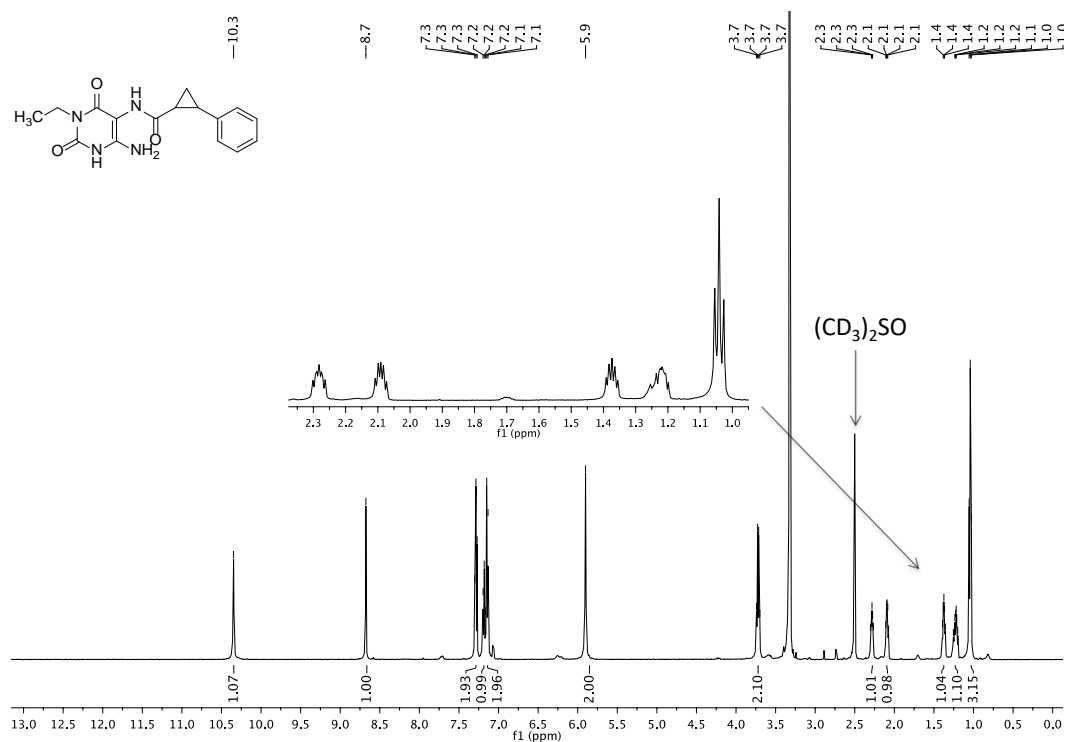

**Figure S25.**  $^{13}\text{C}$ -NMR spectrum of 33 in  $(\text{CD}_3)_2\text{SO}$  at room temperature.

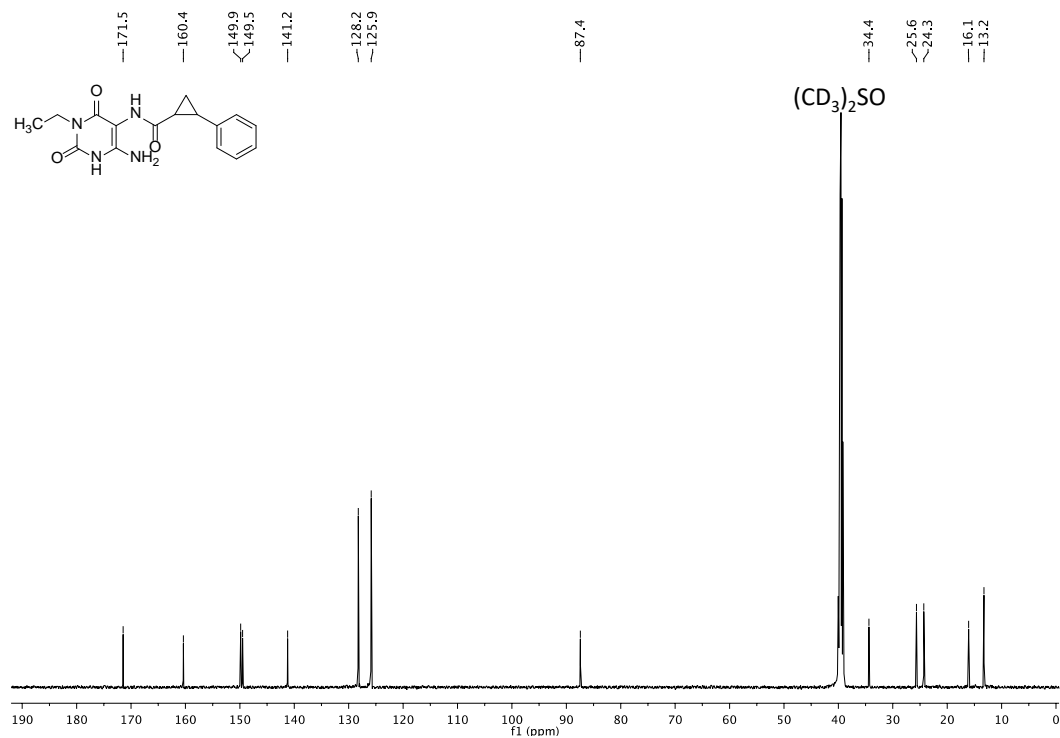

Figure S26. <sup>13</sup>C-NMR spectrum of 33 in (CD<sub>3</sub>)<sub>2</sub>SO at room temperature.

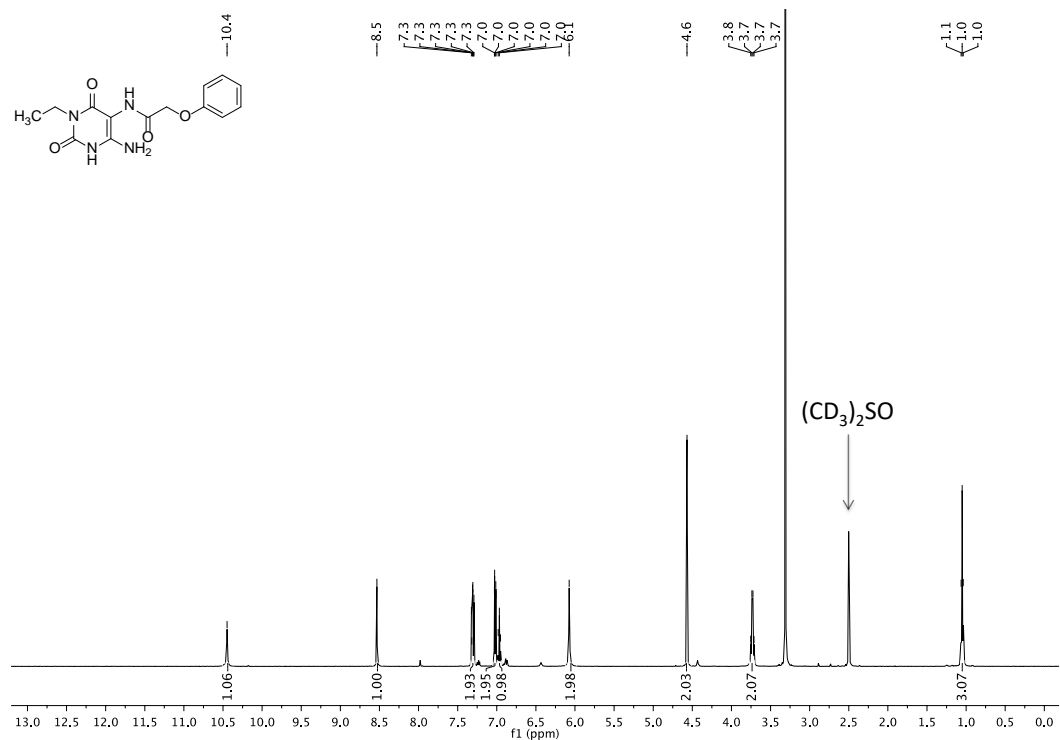

Figure S27. <sup>1</sup>H-NMR spectrum of 34 in (CD<sub>3</sub>)<sub>2</sub>SO at room temperature.

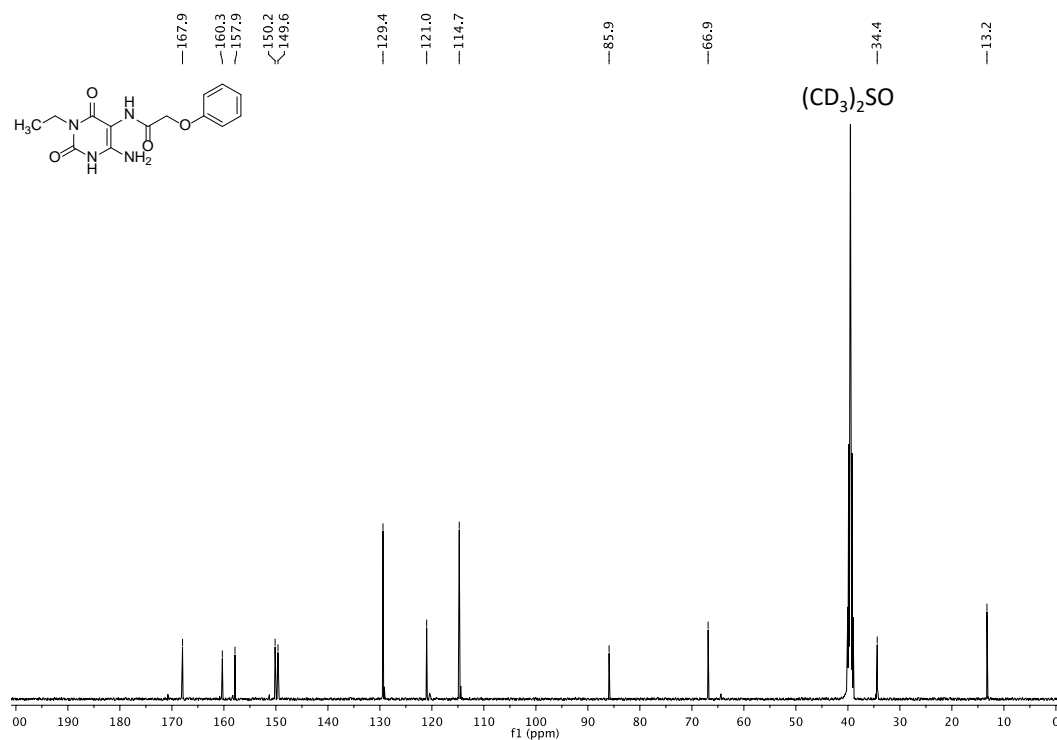

**Figure S28.** <sup>13</sup>C-NMR spectrum of 34 in (CD<sub>3</sub>)<sub>2</sub>SO at room temperature.

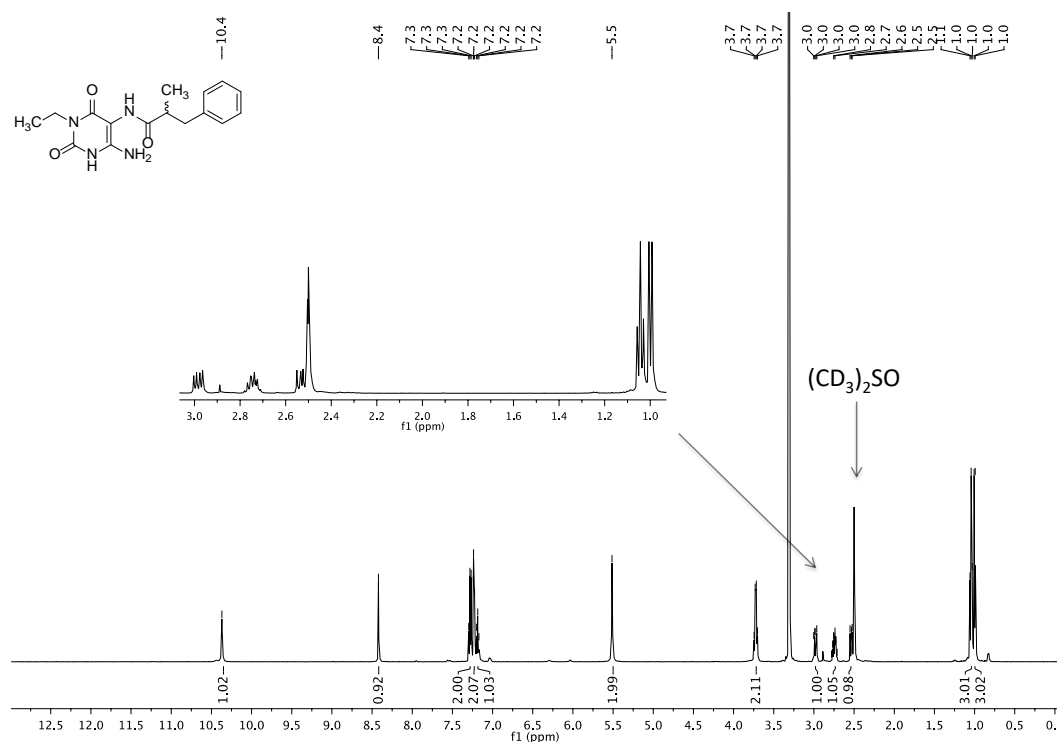

**Figure S29.** <sup>1</sup>H-NMR spectrum of 35 in (CD<sub>3</sub>)<sub>2</sub>SO at room temperature.



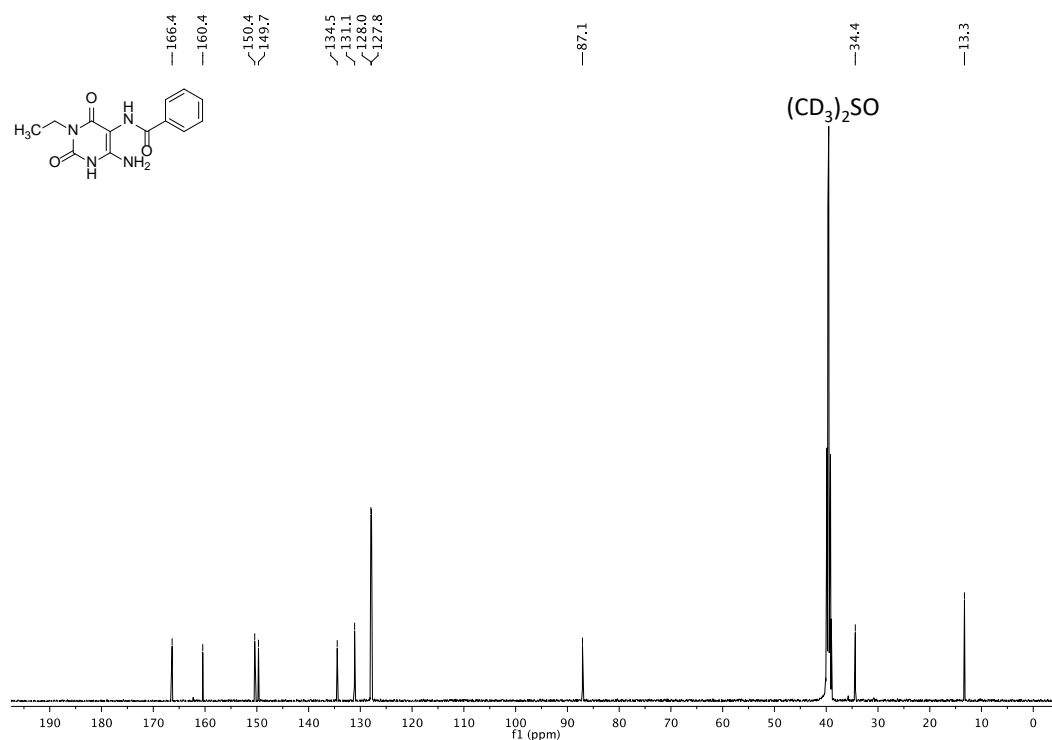

**Figure S32**  $^{13}\text{C}$ -NMR spectrum of 36 in  $(\text{CD}_3)_2\text{SO}$  at room temperature.

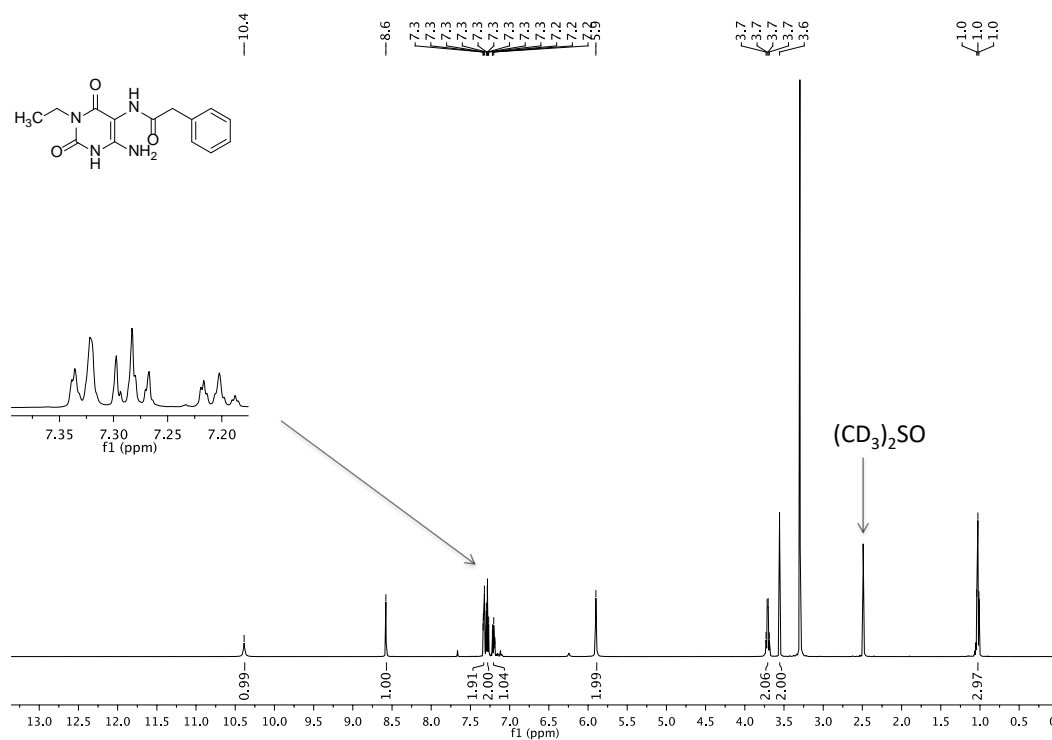

**Figure S33.**  $^1\text{H}$ -NMR spectrum of 37 in  $(\text{CD}_3)_2\text{SO}$  at room temperature.



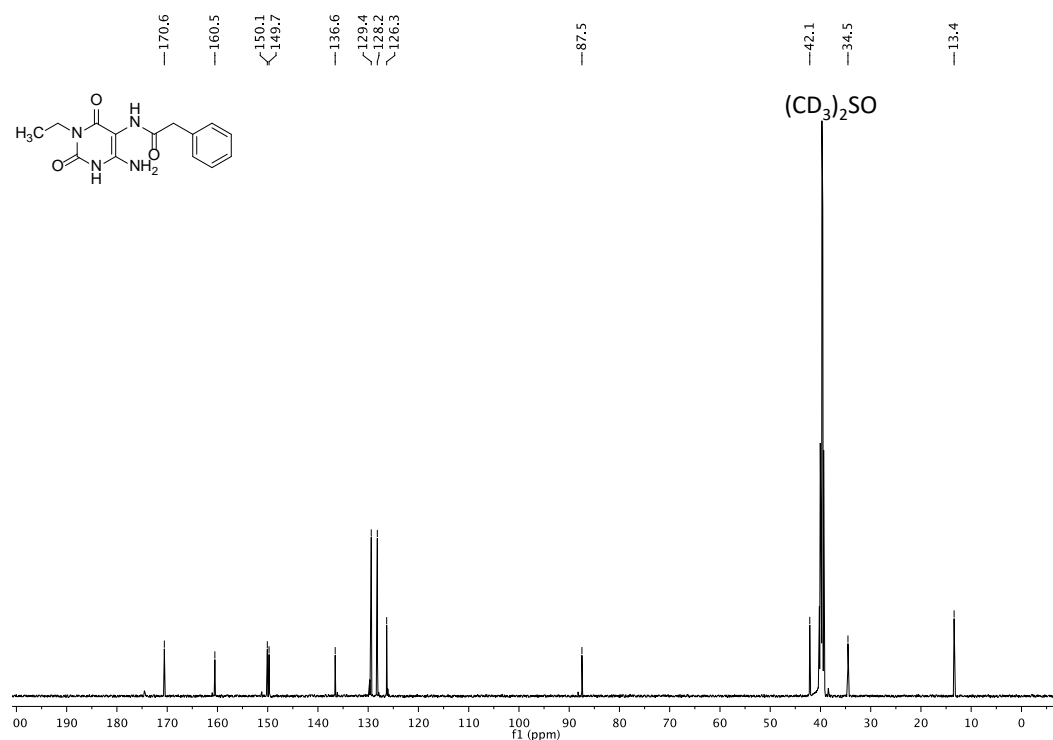

Figure S34.  $^{13}\text{C}$ -NMR spectrum of 37 in  $(\text{CD}_3)_2\text{SO}$  at room temperature.

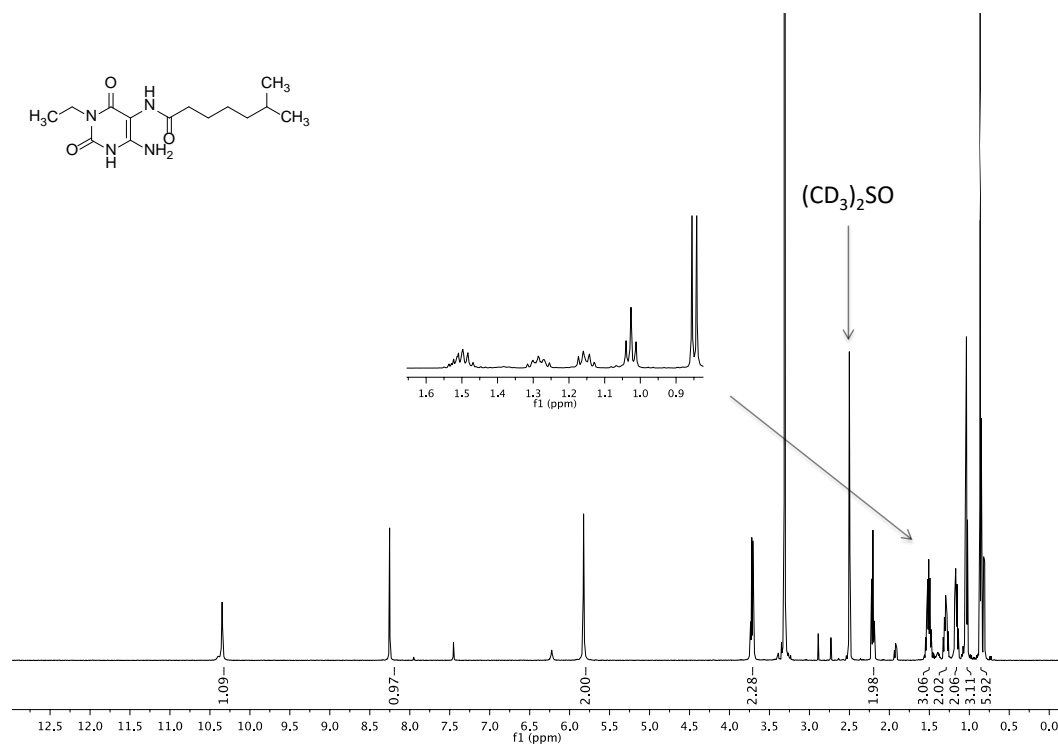

Figure S35.  $^1\text{H}$ -NMR spectrum of 38 in  $(\text{CD}_3)_2\text{SO}$  at room temperature.

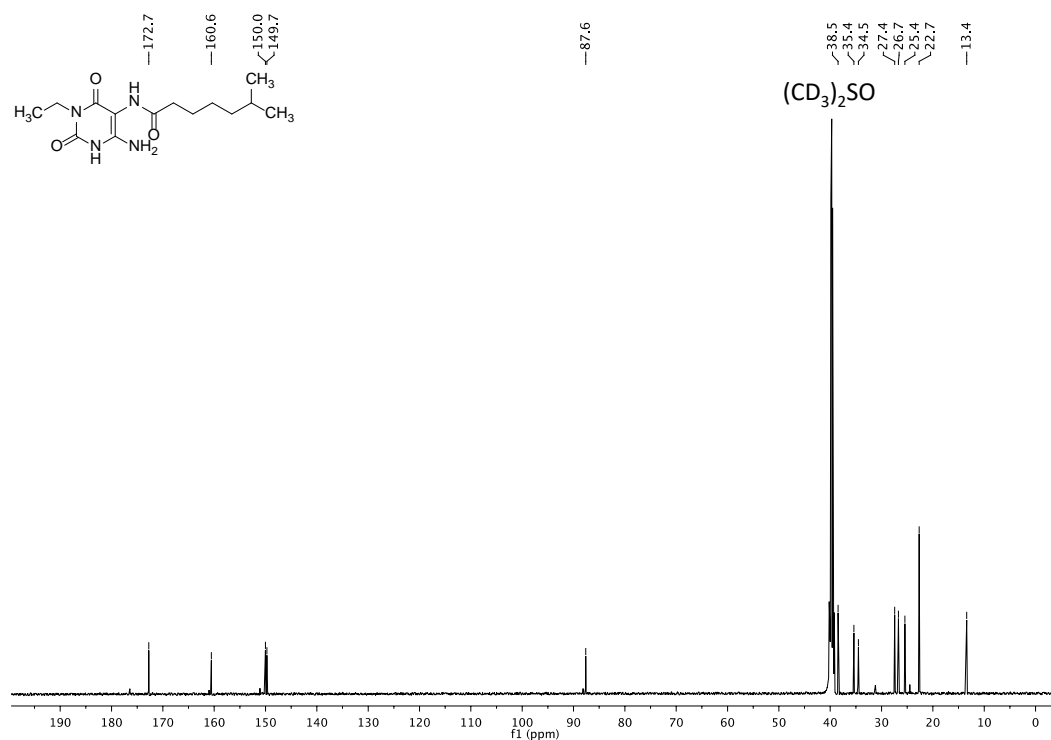

Figure S36. <sup>13</sup>C-NMR spectrum of 38 in (CD<sub>3</sub>)<sub>2</sub>SO at room temperature.

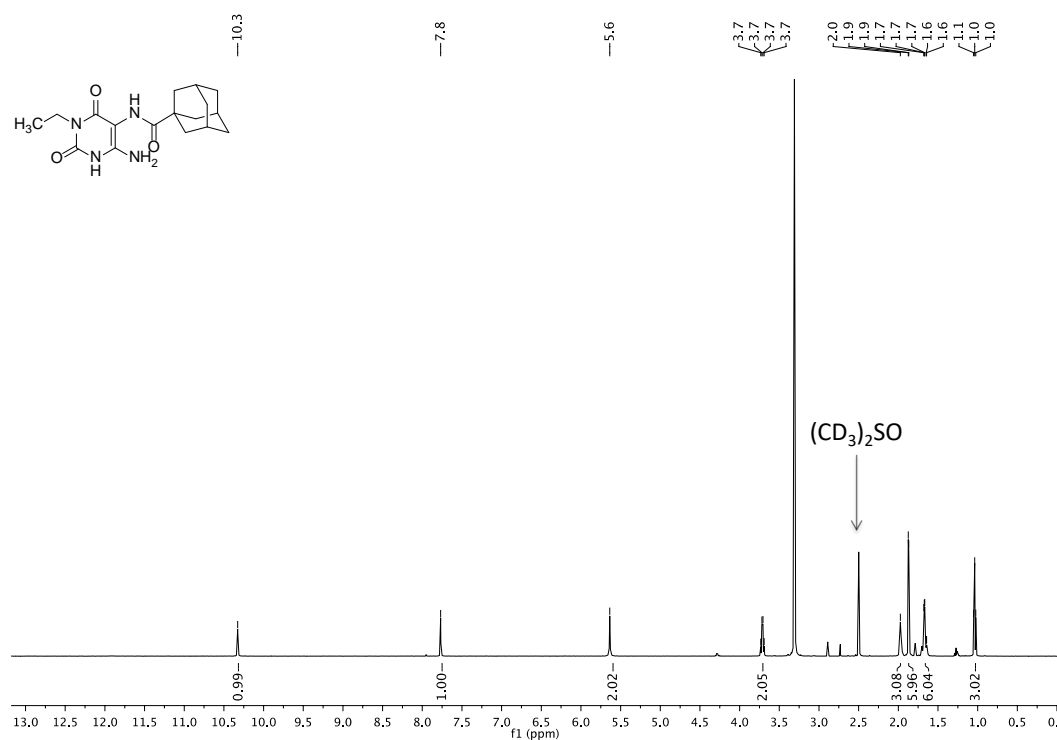

Figure S37. <sup>1</sup>H-NMR spectrum of 39 in (CD<sub>3</sub>)<sub>2</sub>SO at room temperature.

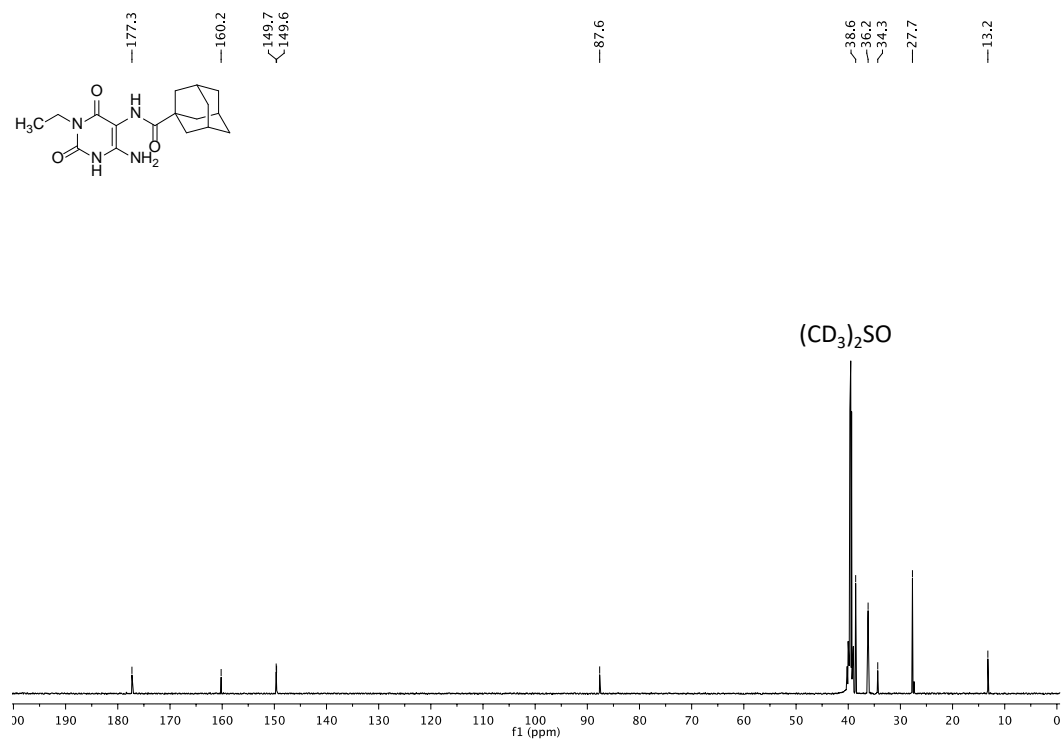

**Figure S38.**  $^{13}\text{C}$ -NMR spectrum of 39 in  $(\text{CD}_3)_2\text{SO}$  at room temperature.

## IR-spectra of compounds 21-

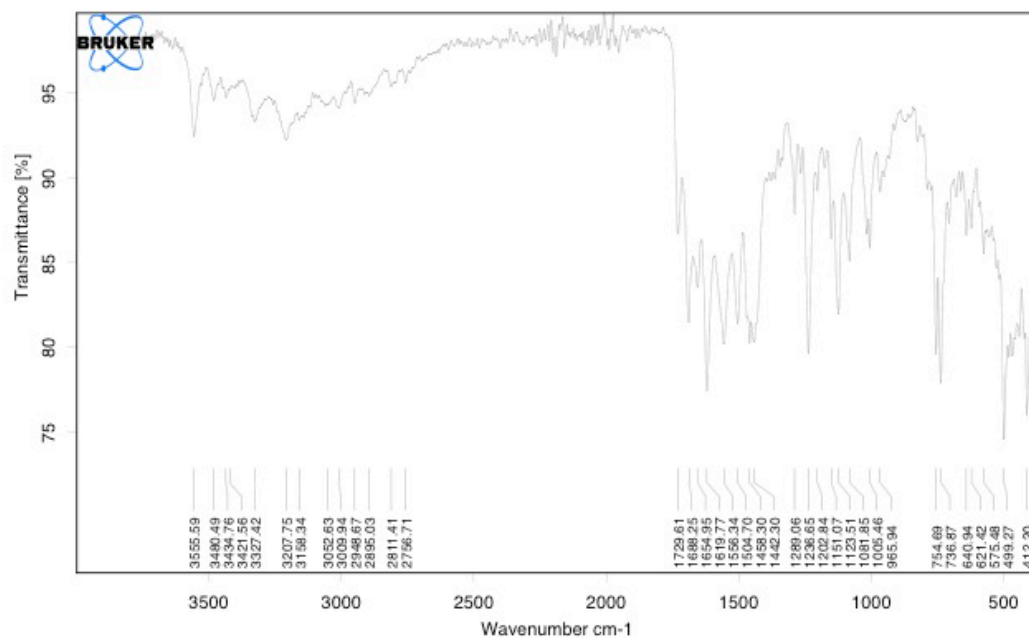

39

Figure S39. IR-spectrum of 21.

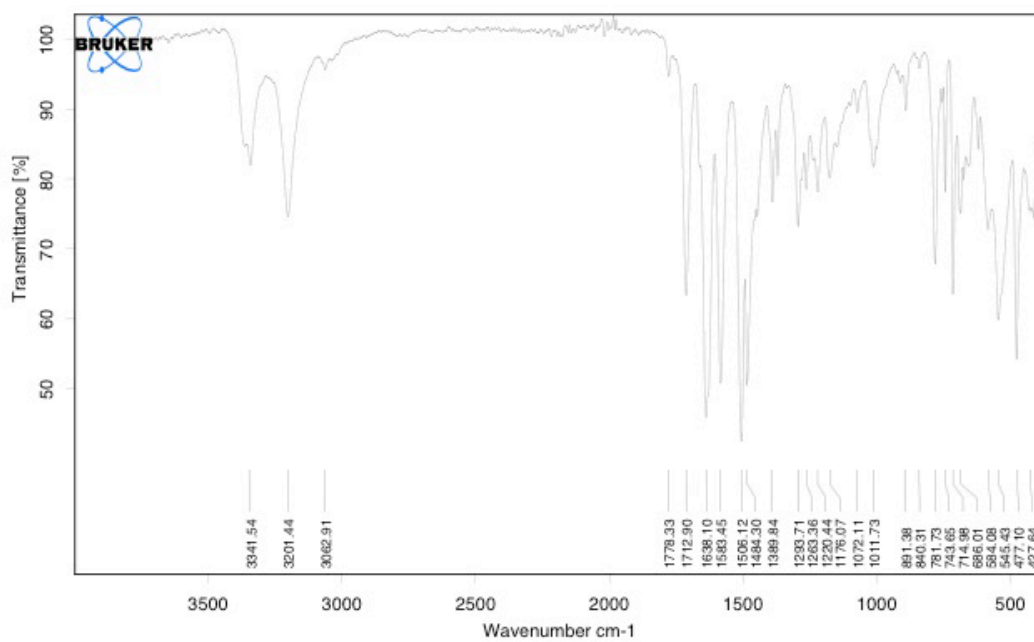

Figure S40. IR-spectrum of 22.

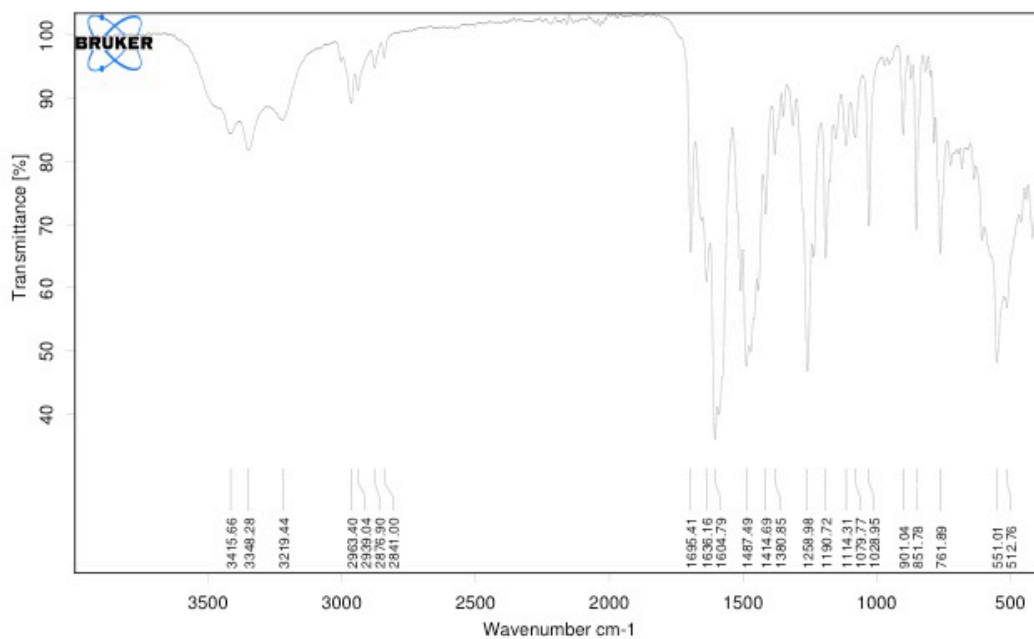

Figure S41. IR-spectrum of 23.

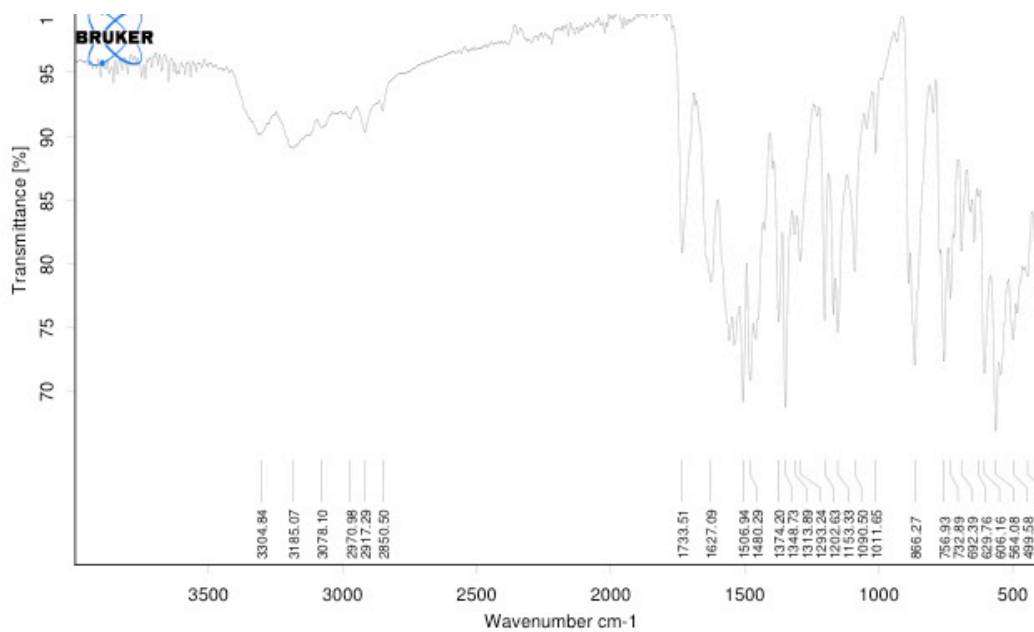

Figure S42. IR-spectrum of 24.

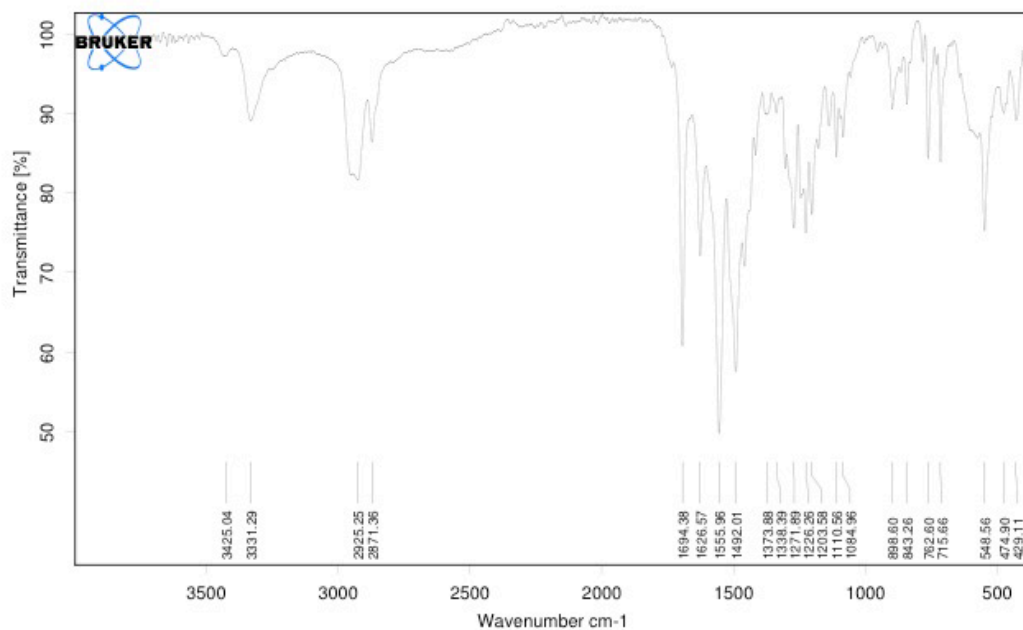

Figure S43. IR-spectrum of 25.

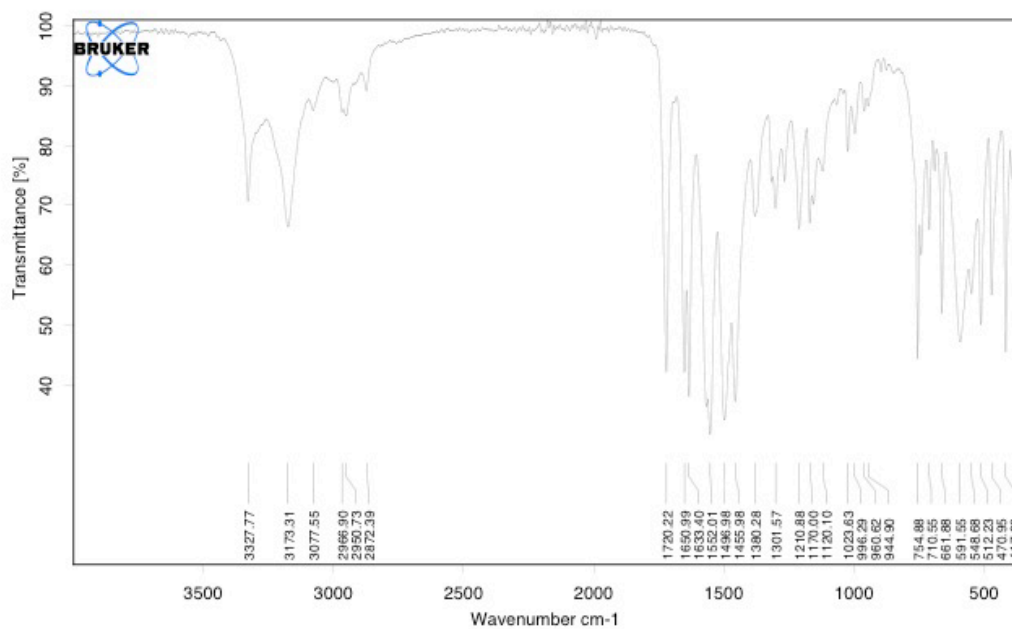

Figure S44. IR-spectrum of 26

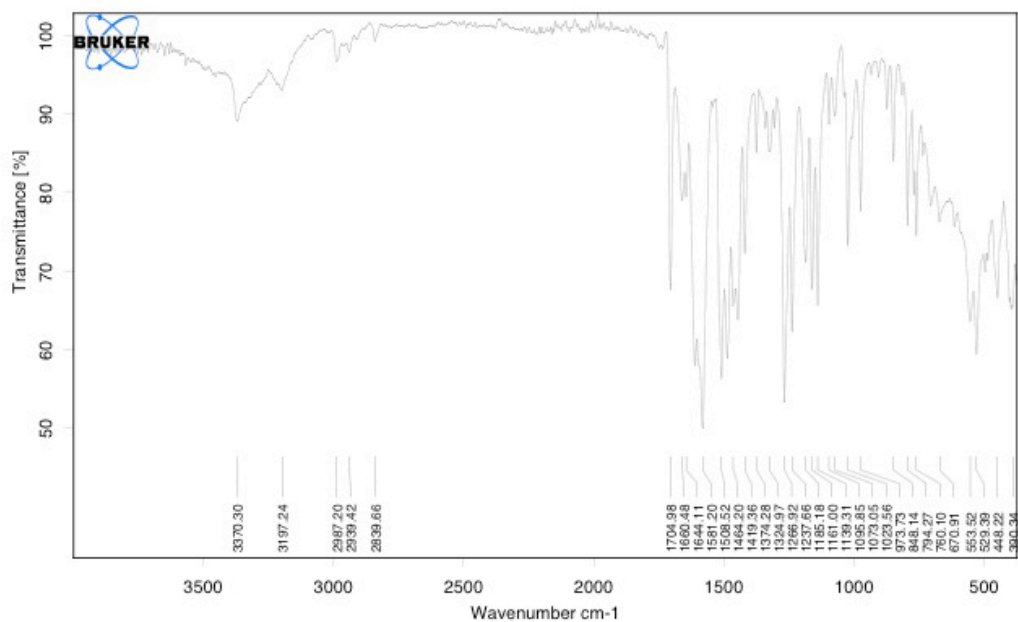

Figure S45. IR-spectrum of 27.

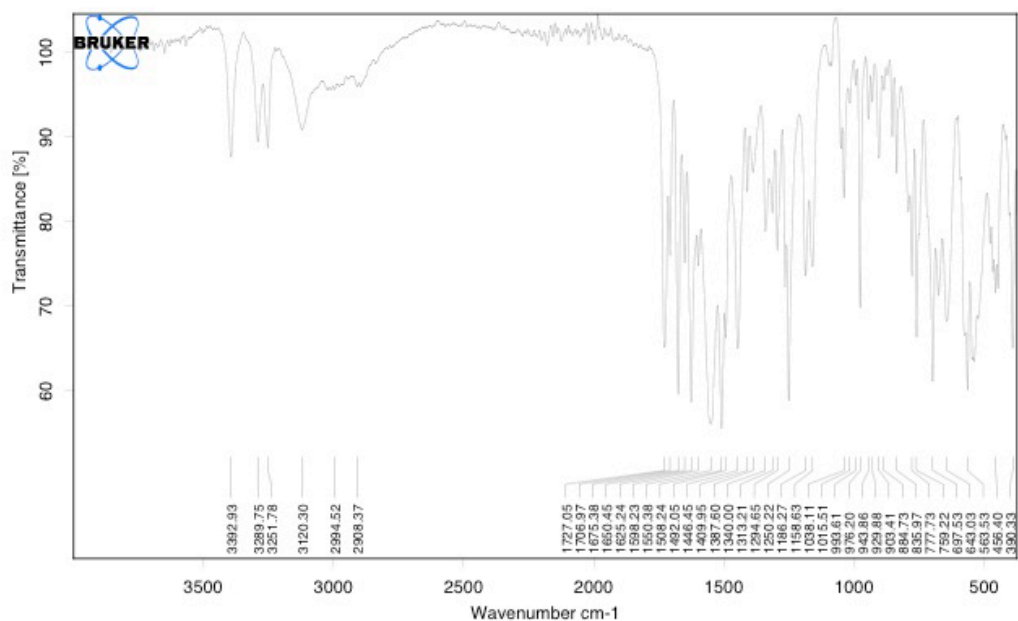

Figure S46. IR-spectrum of 28.

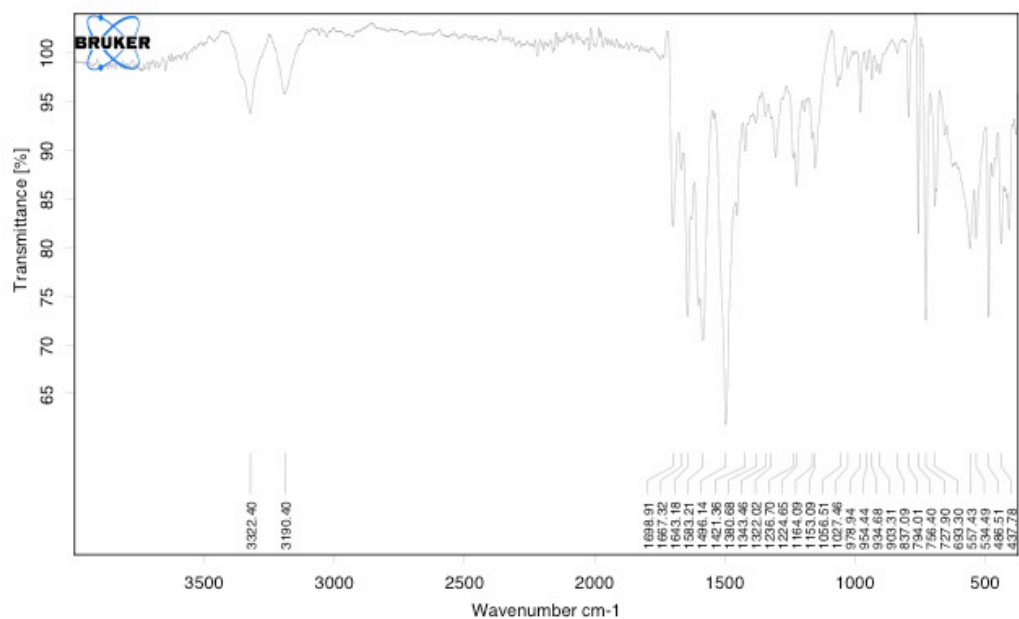

Figure S47. IR-spectrum of 29.

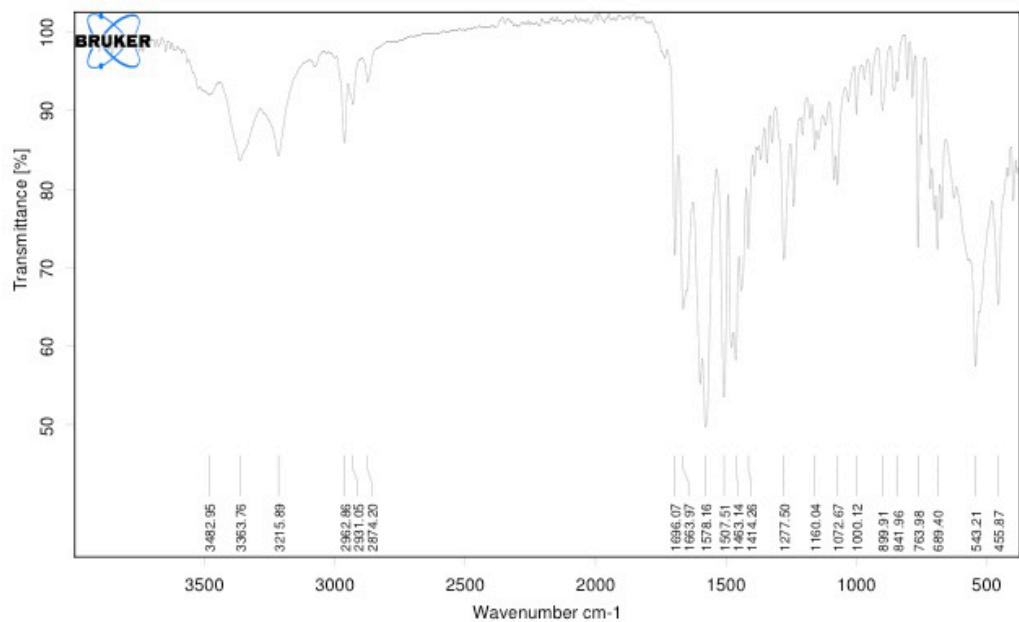

Figure S48. IR-spectrum of 30.



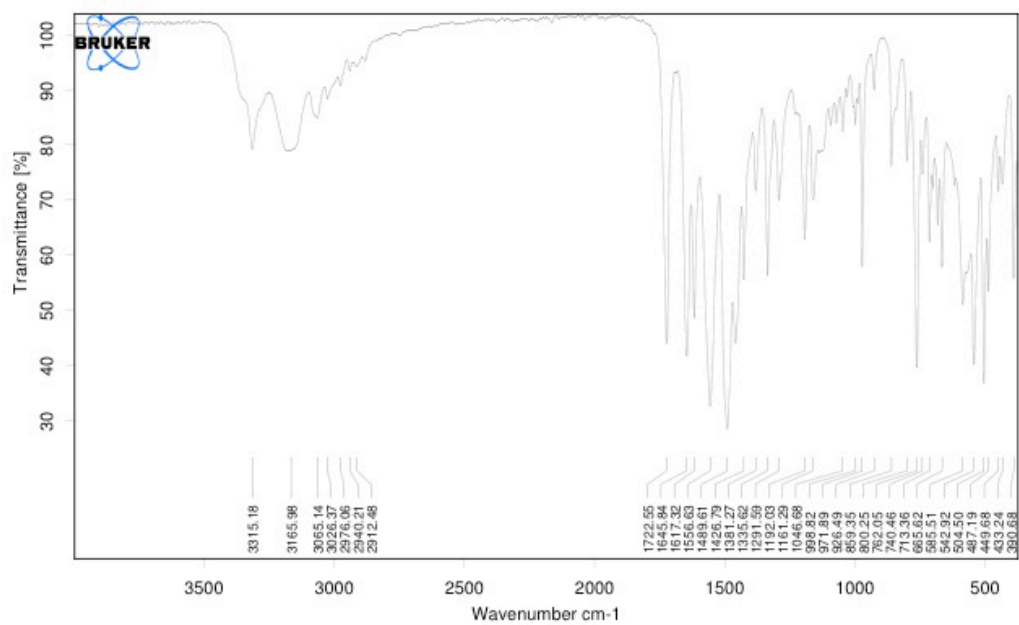

Figure S49. IR-spectrum of 31.

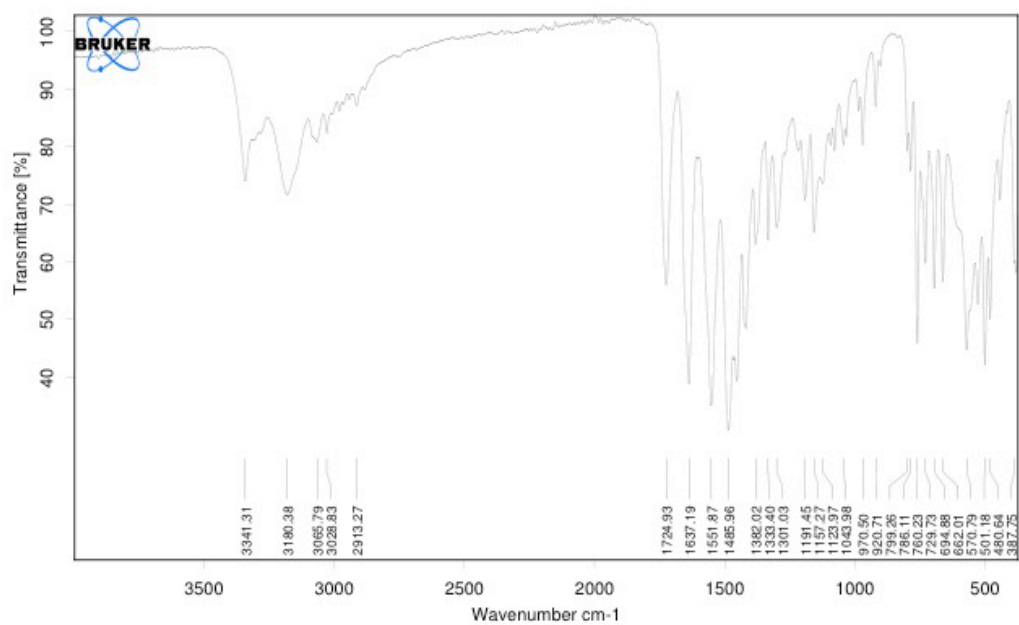

Figure S50. IR-spectrum of 32.

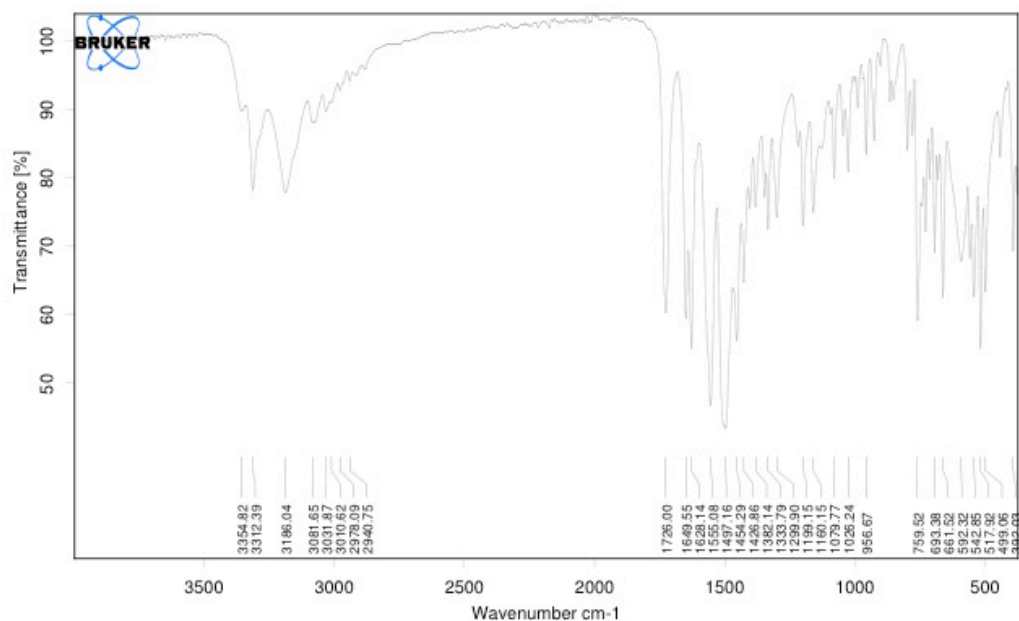

Figure S51. IR-spectrum of 33.

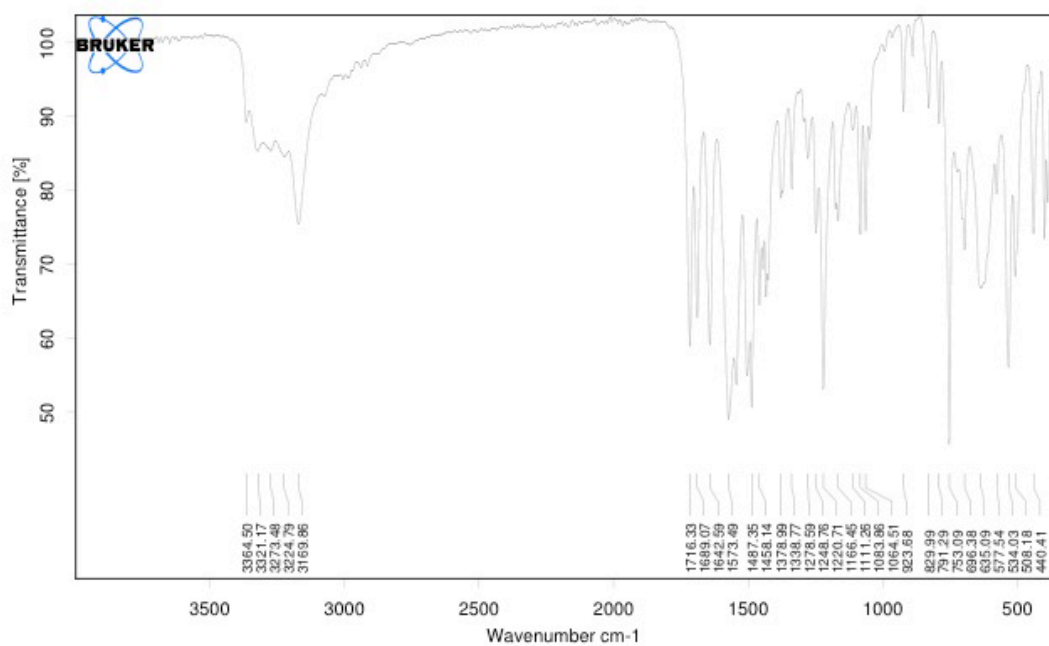

Figure S52. IR-spectrum of 34.

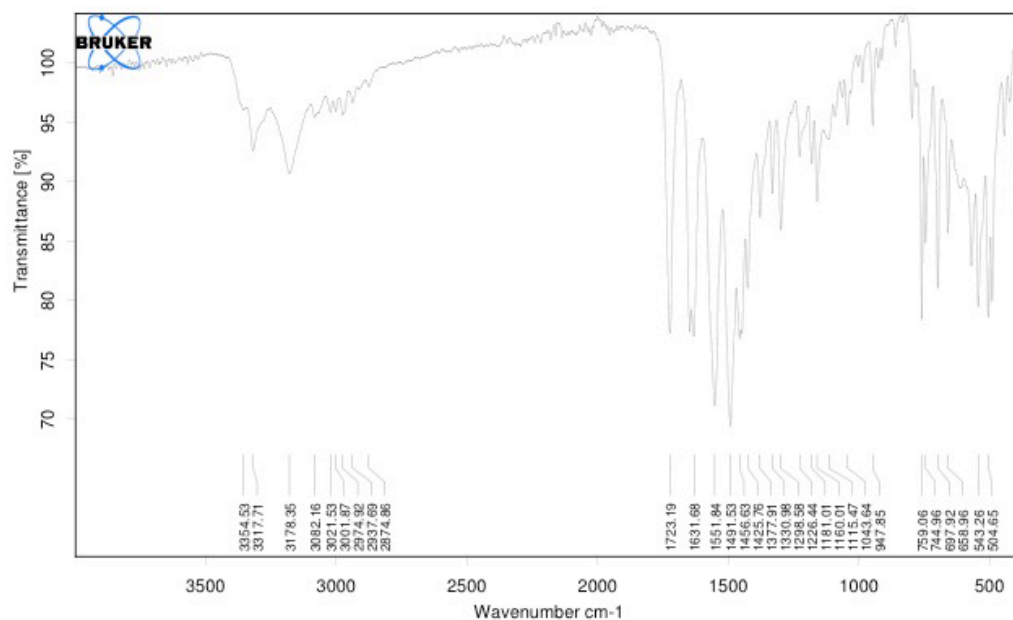

Figure S53. IR-spectrum of 35.

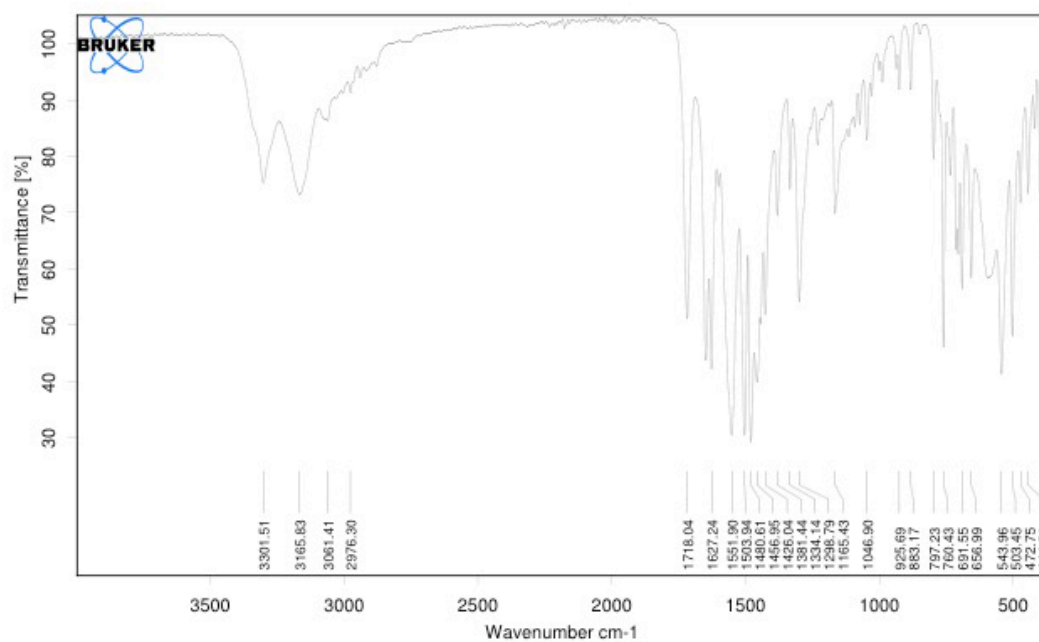

Figure S54. IR-spectrum of 36.

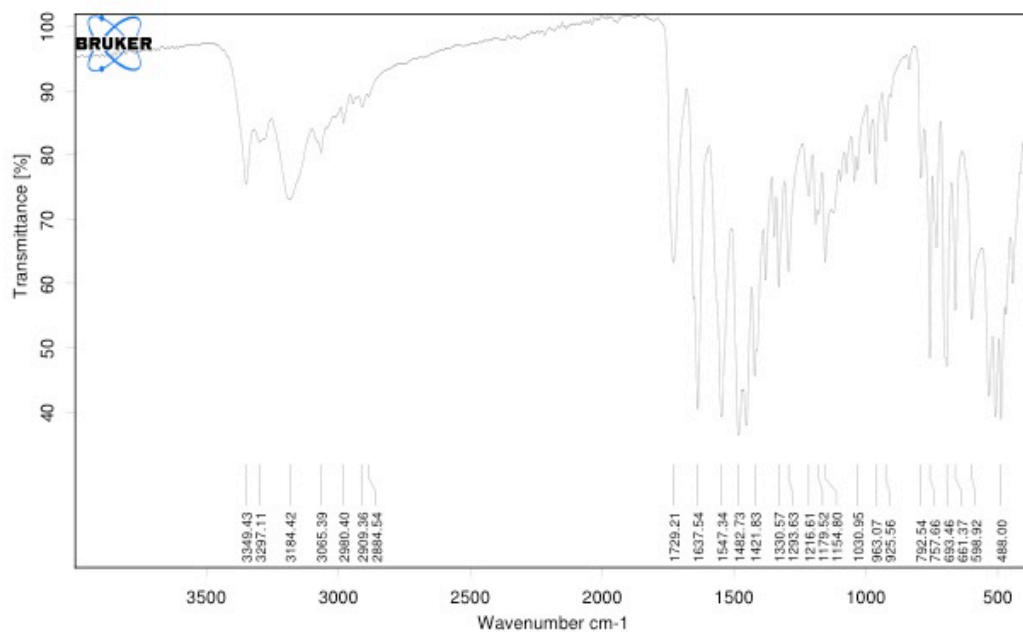

Figure S55. IR-spectrum of 37.

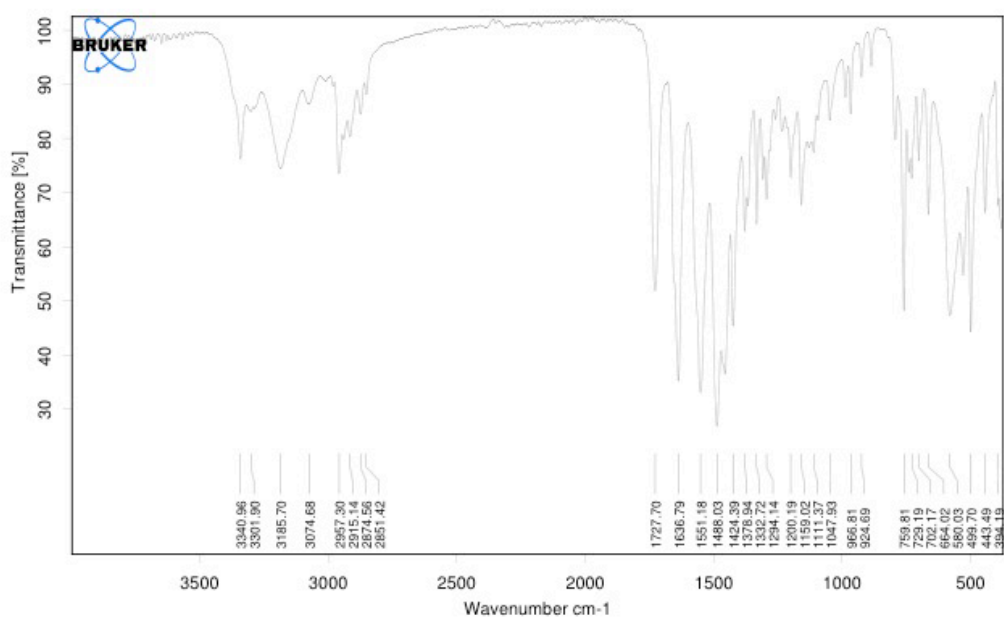

Figure S56. IR-spectrum of 38.

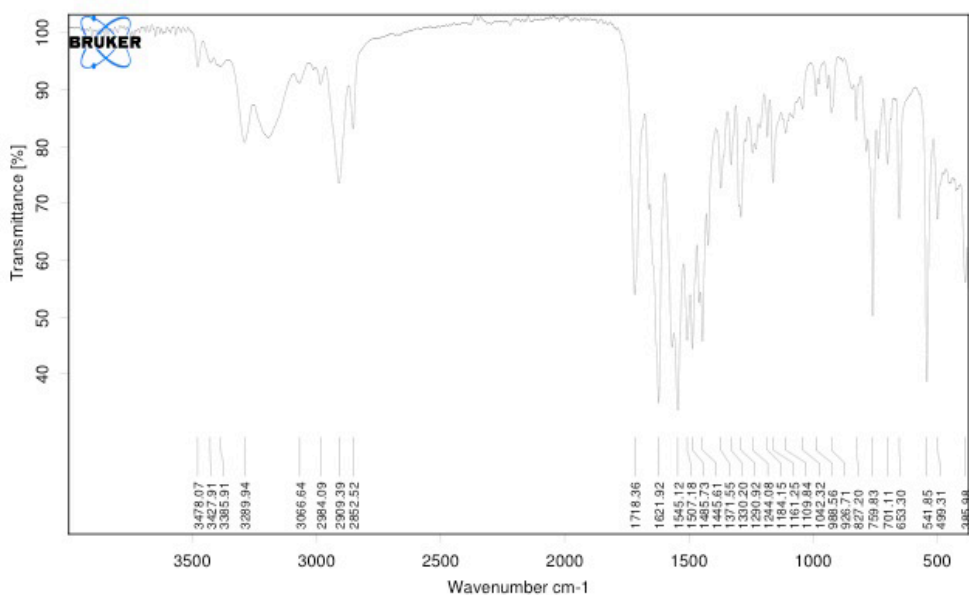

**Figure S57. IR-spectrum of 39.**

## References

- Hockemeyer, J., Burbiel, J.C., and Müller, C.E. (2004). Multigram-scale syntheses, stability, and photoreactions of A<sub>2A</sub> adenosine receptor antagonists with 8-styrylxanthine structure: Potential drugs for Parkinson's disease. *J. Org. Chem.* 69, 3308-3318. doi: 10.1021/jo0358574.
- Maxwell, L.C.E., and Salivar, C.J. (1952). Method of preparing 4-aminouracils. *US2715625A*.
- Müller, C.E., Shi, D., Manning Jr, M., and Daly, J.W. (1993). Synthesis of paraxanthine analogs (1, 7-disubstituted xanthines) and other xanthines unsubstituted at the 3-position: Structure-activity relationships at adenosine receptors. *J. Med. Chem.* 36, 3341-3349.
